# Supplementary material for: Small Homologous Blocks in Phytophthora Genomes Do Not Point to an Ancient Whole-Genome Duplication
Source: PubMed Central journal article supplement — Genome Biol Evol. 2014 Apr 23;6(5):1079–85. doi: 10.1093/gbe/evu081 (PMC4040989; doi:10.1093/gbe/evu081), 2014-04-23
Supplement: supp_evu081_vanHooff_SupplementaryTables.pdf [file supp_evu081_vanHooff_SupplementaryTables.pdf]

## Supplementary Tables

Table S1. Features of previously detected 2HOM blocks (Martens and Van de Peer 2010). TE-containing blocks include at least one gene showing significant similarity to the Repbase transposable element database (Jurka et al. 2005).

| <b>Species</b>      | <b>2HOM blocks</b> | <b>TE-containing</b> | <b>&gt;2 copies</b> | <b>Same scaffold</b> | <b>Non-TE, 2 copies, different scaffolds</b> |
|---------------------|--------------------|----------------------|---------------------|----------------------|----------------------------------------------|
| <i>P. infestans</i> | 253                | 50                   | 60                  | 65                   | 119                                          |
| <i>P. ramorum</i>   | 128                | 11                   | 22                  | 61                   | 48                                           |
| <i>P. sojae</i>     | 207                | 52                   | 32                  | 81                   | 65                                           |

**Table S2. All 2HOM blocks found by Martens and van de Peer (2010) and their presence or absence in our dataset. Our method of block detection yielded 345 out of 587 blocks. If a 2HOM block is missing, the cause of this absence is given in this table; the majority of the missing blocks (197) can be explained by our stringent protein family interference (see Supplementary Materials & Methods, here referred to as ‘dissimilar families’). Alternatively, a 2HOM block is not detected because the most recent genome version no longer includes one or both genes constituting the block (42 cases, ‘gene missing’). Lastly, three 2HOM blocks were not detected because the protein families we constructed consider both genes constituting the block to be part of the same family. Presence or absence of the individual 2HOM block copies is also recorded. In some instances, a 2HOM block is found, but with one or more copies found on a different location (‘Present (diff. copies)’).**

| 2HOM block       | Comparison 2HOM     | Comparison copies    | Gene1      | Family1     | Gene2      | Family2     |
|------------------|---------------------|----------------------|------------|-------------|------------|-------------|
| BlockID: Pin_1   | Dissimilar families |                      |            |             |            |             |
|                  |                     | Block DOES NOT EXIST | PITG_01491 | Family13447 | PITG_01492 | Family12397 |
|                  |                     | Block DOES NOT EXIST | PITG_20486 | Family11771 | PITG_20487 | Family16368 |
| BlockID: Pin_10  | Present             |                      |            |             |            |             |
|                  |                     | Block EXISTS         | PITG_06546 | Family1855  | PITG_06547 | Family4710  |
|                  |                     | Block EXISTS         | PITG_15081 | Family1855  | PITG_15082 | Family4710  |
| BlockID: Pin_100 | Present             |                      |            |             |            |             |
|                  |                     | Block EXISTS         | PITG_14782 | Family374   | PITG_14783 | Family16976 |
|                  |                     | Block EXISTS         | PITG_14787 | Family16976 | PITG_14788 | Family374   |
| BlockID: Pin_101 | Dissimilar families |                      |            |             |            |             |
|                  |                     | Block DOES NOT EXIST | PITG_00725 | Family1546  | PITG_00726 | Family6057  |
|                  |                     | Block DOES NOT EXIST | PITG_00742 | Family18065 | PITG_00743 | Family12988 |
| BlockID: Pin_102 | Present             |                      |            |             |            |             |
|                  |                     | Block EXISTS         | PITG_09522 | Family4367  | PITG_09523 | Family2094  |
|                  |                     | Block EXISTS         | PITG_09629 | Family2094  | PITG_09630 | Family4367  |
| BlockID: Pin_103 | Dissimilar families |                      |            |             |            |             |
|                  |                     | Block EXISTS         | PITG_11941 | Family187   | PITG_11942 | Family412   |
|                  |                     | Block DOES NOT EXIST | PITG_11956 | Family1520  | PITG_11957 | Family8650  |
| BlockID: Pin_104 | Dissimilar families |                      |            |             |            |             |
|                  |                     | Block DOES NOT EXIST | PITG_15815 | Family6     | PITG_15817 | Family4156  |
|                  |                     | Block DOES NOT EXIST | PITG_19676 | Family28623 | PITG_19677 | Family6     |
| BlockID: Pin_105 | Present             |                      |            |             |            |             |
|                  |                     | Block DOES NOT EXIST | PITG_14533 | Family11906 | PITG_14534 | Family680   |
|                  |                     | Block EXISTS         | PITG_14543 | Family15981 | PITG_14546 | Family680   |
|                  |                     | Block EXISTS         | PITG_15511 | Family680   | PITG_15512 | Family15981 |
| BlockID: Pin_106 | Present             |                      |            |             |            |             |
|                  |                     | Block EXISTS         | PITG_05056 | Family1782  | PITG_22753 | Family12051 |
|                  |                     | Block DOES NOT EXIST | PITG_16555 | Family1782  | PITG_23078 | Family544   |
|                  |                     | Block EXISTS         | PITG_17201 | Family1782  | PITG_23105 | Family12051 |
|                  |                     | Block EXISTS         | PITG_19371 | Family1782  | PITG_19372 | Family12051 |
| BlockID: Pin_107 | Dissimilar families |                      |            |             |            |             |
|                  |                     | Block DOES NOT EXIST | PITG_07589 | Family7386  | PITG_07591 | Family30    |
|                  |                     | Block DOES NOT EXIST | PITG_18613 | Family81    | PITG_18614 | Family28568 |
| BlockID: Pin_108 | Present             |                      |            |             |            |             |
|                  |                     | Block EXISTS         | PITG_14037 | Family12186 | PITG_14038 | Family968   |
|                  |                     | Block EXISTS         | PITG_16303 | Family968   | PITG_16304 | Family12186 |
| BlockID: Pin_109 | Present             |                      |            |             |            |             |
|                  |                     | Block EXISTS         | PITG_12082 | Family6904  | PITG_23274 | Family435   |
|                  |                     | Block EXISTS         | PITG_16579 | Family6904  | PITG_23082 | Family721   |
|                  |                     | Block EXISTS         | PITG_16585 | Family435   | PITG_16586 | Family6904  |
|                  |                     | Block EXISTS         | PITG_16608 | Family6904  | PITG_16609 | Family721   |
|                  |                     | Block DOES NOT EXIST | PITG_16616 | Family8058  | PITG_16617 | Family6904  |
|                  |                     | Block EXISTS         | PITG_20162 | Family6904  | PITG_20163 | Family435   |
| BlockID: Pin_11  | Present             |                      |            |             |            |             |
|                  |                     | Block EXISTS         | PITG_10324 | Family5809  | PITG_10325 | Family6924  |
|                  |                     | Block EXISTS         | PITG_19245 | Family6924  | PITG_19247 | Family5809  |
| BlockID: Pin_110 | Present             |                      |            |             |            |             |
|                  |                     | Block EXISTS         | PITG_03551 | Family203   | PITG_03552 | Family194   |
|                  |                     | Block EXISTS         | PITG_05675 | Family203   | PITG_05676 | Family194   |
| BlockID: Pin_111 | Dissimilar families |                      |            |             |            |             |

|                  |                      |            |             |            |             |
|------------------|----------------------|------------|-------------|------------|-------------|
|                  | Block DOES NOT EXIST | PITG_19552 | Family4697  | PITG_19553 | Family13090 |
|                  | Block DOES NOT EXIST | PITG_19554 | Family92    | PITG_19555 | Family12391 |
| BlockID: Pin_112 | Present              |            |             |            |             |
|                  | Block EXISTS         | PITG_10320 | Family58    | PITG_10321 | Family4619  |
|                  | Block EXISTS         | PITG_19249 | Family4619  | PITG_19250 | Family58    |
| BlockID: Pin_113 | Dissimilar families  |            |             |            |             |
|                  | Block DOES NOT EXIST | PITG_12627 | Family1560  | PITG_12629 | Family28294 |
|                  | Block DOES NOT EXIST | PITG_16601 | Family11865 | PITG_16603 | Family435   |
| BlockID: Pin_114 | Present              |            |             |            |             |
|                  | Block EXISTS         | PITG_03216 | Family13502 | PITG_22715 | Family2036  |
|                  | Block EXISTS         | PITG_06505 | Family2036  | PITG_06506 | Family13502 |
| BlockID: Pin_115 | Present              |            |             |            |             |
|                  | Block EXISTS         | PITG_12706 | Family12078 | PITG_12707 | Family10863 |
|                  | Block EXISTS         | PITG_15453 | Family10863 | PITG_15454 | Family12078 |
| BlockID: Pin_116 | Present              |            |             |            |             |
|                  | Block EXISTS         | PITG_07367 | Family113   | PITG_07371 | Family491   |
|                  | Block EXISTS         | PITG_12757 | Family491   | PITG_12758 | Family113   |
| BlockID: Pin_117 | Dissimilar families  |            |             |            |             |
|                  | Block DOES NOT EXIST | PITG_10331 | Family2772  | PITG_10332 | Family28165 |
|                  | Block DOES NOT EXIST | PITG_19239 | Family11634 | PITG_19240 | Family2772  |
| BlockID: Pin_118 | Dissimilar families  |            |             |            |             |
|                  | Block DOES NOT EXIST | PITG_09456 | Family611   | PITG_09457 | Family52    |
|                  | Block DOES NOT EXIST | PITG_09459 | Family611   | PITG_22888 | Family9350  |
| BlockID: Pin_119 | Present              |            |             |            |             |
|                  | Block EXISTS         | PITG_10333 | Family2500  | PITG_10334 | Family2072  |
|                  | Block EXISTS         | PITG_19235 | Family2072  | PITG_19237 | Family2500  |
| BlockID: Pin_12  | Present              |            |             |            |             |
|                  | Block EXISTS         | PITG_07651 | Family2405  | PITG_07652 | Family245   |
|                  | Block EXISTS         | PITG_18687 | Family245   | PITG_18688 | Family2405  |
| BlockID: Pin_120 | Present              |            |             |            |             |
|                  | Block EXISTS         | PITG_03538 | Family213   | PITG_03540 | Family162   |
|                  | Block EXISTS         | PITG_03542 | Family162   | PITG_03543 | Family213   |
| BlockID: Pin_121 | Present              |            |             |            |             |
|                  | Block EXISTS         | PITG_03438 | Family2227  | PITG_03439 | Family104   |
|                  | Block EXISTS         | PITG_03442 | Family104   | PITG_03443 | Family2227  |
| BlockID: Pin_122 | Dissimilar families  |            |             |            |             |
|                  | Block DOES NOT EXIST | PITG_01685 | Family1185  | PITG_01686 | Family18075 |
|                  | Block DOES NOT EXIST | PITG_16306 | Family12281 | PITG_16307 | Family12432 |
|                  | Block DOES NOT EXIST | PITG_18887 | Family12281 | PITG_18888 | Family17330 |
| BlockID: Pin_123 | Present              |            |             |            |             |
|                  | Block EXISTS         | PITG_15003 | Family2538  | PITG_15004 | Family21    |
|                  | Block EXISTS         | PITG_18261 | Family21    | PITG_18262 | Family95    |
|                  | Block EXISTS         | PITG_18263 | Family21    | PITG_18265 | Family2538  |
| BlockID: Pin_124 | Present              |            |             |            |             |
|                  | Block EXISTS         | PITG_12497 | Family7344  | PITG_12498 | Family6743  |
|                  | Block EXISTS         | PITG_21211 | Family6743  | PITG_21212 | Family7344  |
| BlockID: Pin_125 | Present              |            |             |            |             |
|                  | Block EXISTS         | PITG_17351 | Family6155  | PITG_17352 | Family11948 |
|                  | Block EXISTS         | PITG_20726 | Family11948 | PITG_20727 | Family6155  |
| BlockID: Pin_126 | Present              |            |             |            |             |
|                  | Block EXISTS         | PITG_02616 | Family224   | PITG_02617 | Family9702  |
|                  | Block EXISTS         | PITG_21763 | Family9702  | PITG_21764 | Family224   |
| BlockID: Pin_127 | Present              |            |             |            |             |
|                  | Block EXISTS         | PITG_05019 | Family9155  | PITG_05020 | Family2586  |
|                  | Block DOES NOT EXIST | PITG_14327 | Family2586  | PITG_14328 | Family691   |
|                  | Block EXISTS         | PITG_17180 | Family9155  | PITG_17181 | Family2586  |
|                  | Block EXISTS         | PITG_18563 | Family9155  | PITG_18564 | Family2586  |
| BlockID: Pin_128 | Dissimilar families  |            |             |            |             |
|                  | Block EXISTS         | PITG_07727 | Family1036  | PITG_07728 | Family239   |
|                  | Block DOES NOT EXIST | PITG_20012 | Family28644 | PITG_20013 | Family4613  |

|                  |                        |                      |            |             |            |             |
|------------------|------------------------|----------------------|------------|-------------|------------|-------------|
| BlockID: Pin_129 | Dissimilar families    |                      |            |             |            |             |
|                  |                        | Block DOES NOT EXIST | PITG_15392 | Family441   | PITG_15393 | Family3441  |
|                  |                        | Block DOES NOT EXIST | PITG_21283 | Family28720 | PITG_21284 | Family28721 |
| BlockID: Pin_13  | Present (diff. copies) |                      |            |             |            |             |
|                  |                        | Block DOES NOT EXIST | PITG_18663 | Family1970  | PITG_18664 | Family14489 |
|                  |                        | Block EXISTS         | PITG_20859 | Family14489 | PITG_23194 | Family12441 |
| BlockID: Pin_130 | Dissimilar families    |                      |            |             |            |             |
|                  |                        | Block DOES NOT EXIST | PITG_09531 | Family5744  | PITG_09532 | Family28121 |
|                  |                        | Block DOES NOT EXIST | PITG_09533 | Family28122 | PITG_09534 | Family5744  |
| BlockID: Pin_131 | Dissimilar families    |                      |            |             |            |             |
|                  |                        | Block DOES NOT EXIST | PITG_15479 | Family15412 | PITG_15480 | Family72    |
|                  |                        | Block DOES NOT EXIST | PITG_16817 | Family72    | PITG_16818 | Family3361  |
| BlockID: Pin_132 | Dissimilar families    |                      |            |             |            |             |
|                  |                        | Block DOES NOT EXIST | PITG_16068 | Family10529 | PITG_16069 | Family937   |
|                  |                        | Block DOES NOT EXIST | PITG_16074 | Family937   | PITG_16075 | Family17563 |
| BlockID: Pin_133 | Dissimilar families    |                      |            |             |            |             |
|                  |                        | Block DOES NOT EXIST | PITG_18140 | Family555   | PITG_18141 | Family10303 |
|                  |                        | Block DOES NOT EXIST | PITG_18142 | Family1153  | PITG_18144 | Family555   |
| BlockID: Pin_134 | Present                |                      |            |             |            |             |
|                  |                        | Block DOES NOT EXIST | PITG_09053 | Family555   | PITG_09054 | Family18143 |
|                  |                        | Block EXISTS         | PITG_18137 | Family555   | PITG_23120 | Family14487 |
|                  |                        | Block EXISTS         | PITG_18145 | Family555   | PITG_18147 | Family14487 |
| BlockID: Pin_135 | Dissimilar families    |                      |            |             |            |             |
|                  |                        | Block DOES NOT EXIST | PITG_15116 | Family78    | PITG_15117 | Family116   |
|                  |                        | Block DOES NOT EXIST | PITG_15118 | Family13918 | PITG_15119 | Family78    |
| BlockID: Pin_136 | Present                |                      |            |             |            |             |
|                  |                        | Block EXISTS         | PITG_00099 | Family6901  | PITG_00100 | Family512   |
|                  |                        | Block EXISTS         | PITG_00104 | Family512   | PITG_00106 | Family6901  |
|                  |                        | Block EXISTS         | PITG_06145 | Family512   | PITG_06146 | Family6901  |
|                  |                        | Block EXISTS         | PITG_06155 | Family6901  | PITG_06156 | Family512   |
|                  |                        | Block EXISTS         | PITG_06161 | Family6901  | PITG_06162 | Family512   |
|                  |                        | Block EXISTS         | PITG_06166 | Family6901  | PITG_06167 | Family512   |
| BlockID: Pin_137 | Dissimilar families    |                      |            |             |            |             |
|                  |                        | Block DOES NOT EXIST | PITG_18151 | Family320   | PITG_18152 | Family16199 |
|                  |                        | Block DOES NOT EXIST | PITG_18984 | Family18067 | PITG_23149 | Family320   |
| BlockID: Pin_138 | Present                |                      |            |             |            |             |
|                  |                        | Block EXISTS         | PITG_05097 | Family4647  | PITG_22756 | Family111   |
|                  |                        | Block EXISTS         | PITG_19230 | Family4647  | PITG_19231 | Family111   |
| BlockID: Pin_139 | Present                |                      |            |             |            |             |
|                  |                        | Block EXISTS         | PITG_13044 | Family1998  | PITG_13045 | Family10140 |
|                  |                        | Block EXISTS         | PITG_13047 | Family10140 | PITG_13048 | Family1998  |
| BlockID: Pin_14  | Present                |                      |            |             |            |             |
|                  |                        | Block EXISTS         | PITG_14493 | Family14477 | PITG_14494 | Family11019 |
|                  |                        | Block EXISTS         | PITG_19491 | Family11019 | PITG_19492 | Family14477 |
| BlockID: Pin_140 | Dissimilar families    |                      |            |             |            |             |
|                  |                        | Block DOES NOT EXIST | PITG_03905 | Family9593  | PITG_03906 | Family9683  |
|                  |                        | Block DOES NOT EXIST | PITG_17637 | Family7424  | PITG_17638 | Family9593  |
| BlockID: Pin_141 | Present                |                      |            |             |            |             |
|                  |                        | Block EXISTS         | PITG_03439 | Family104   | PITG_03440 | Family563   |
|                  |                        | Block EXISTS         | PITG_03441 | Family563   | PITG_03442 | Family104   |
| BlockID: Pin_142 | Dissimilar families    |                      |            |             |            |             |
|                  |                        | Block DOES NOT EXIST | PITG_16507 | Family368   | PITG_16510 | Family70    |
|                  |                        | Block DOES NOT EXIST | PITG_18068 | Family10302 | PITG_18069 | Family41    |
| BlockID: Pin_143 | Dissimilar families    |                      |            |             |            |             |
|                  |                        | Block DOES NOT EXIST | PITG_16230 | Family70    | PITG_16233 | Family2866  |
|                  |                        | Block DOES NOT EXIST | PITG_16418 | Family2866  | PITG_16420 | Family11825 |
| BlockID: Pin_144 | Present                |                      |            |             |            |             |
|                  |                        | Block EXISTS         | PITG_16167 | Family70    | PITG_16168 | Family243   |
|                  |                        | Block DOES NOT EXIST | PITG_16169 | Family418   | PITG_16170 | Family70    |
|                  |                        | Block EXISTS         | PITG_16176 | Family243   | PITG_16177 | Family70    |

|                  |                      |            |             |            |             |
|------------------|----------------------|------------|-------------|------------|-------------|
|                  | Block EXISTS         | PITG_18800 | Family243   | PITG_18801 | Family70    |
| BlockID: Pin_145 | Dissimilar families  |            |             |            |             |
|                  | Block DOES NOT EXIST | PITG_16422 | Family16952 | PITG_23074 | Family9770  |
|                  | Block DOES NOT EXIST | PITG_20933 | Family16952 | PITG_20934 | Family2866  |
| BlockID: Pin_146 | Present              |            |             |            |             |
|                  | Block EXISTS         | PITG_16564 | Family9456  | PITG_16565 | Family14417 |
|                  | Block EXISTS         | PITG_18109 | Family9456  | PITG_18110 | Family14417 |
|                  | Block DOES NOT EXIST | PITG_18350 | Family9456  | PITG_18351 | Family18147 |
| BlockID: Pin_147 | Dissimilar families  |            |             |            |             |
|                  | Block DOES NOT EXIST | PITG_10334 | Family2072  | PITG_10335 | Family28166 |
|                  | Block DOES NOT EXIST | PITG_19234 | Family3967  | PITG_19235 | Family2072  |
| BlockID: Pin_148 | Dissimilar families  |            |             |            |             |
|                  | Block DOES NOT EXIST | PITG_07995 | Family160   | PITG_07996 | Family115   |
|                  | Block DOES NOT EXIST | PITG_19212 | Family115   | PITG_19213 | Family245   |
| BlockID: Pin_149 | Present              |            |             |            |             |
|                  | Block EXISTS         | PITG_14650 | Family18203 | PITG_14651 | Family1921  |
|                  | Block EXISTS         | PITG_14652 | Family1921  | PITG_14653 | Family18203 |
| BlockID: Pin_15  | Present              |            |             |            |             |
|                  | Block EXISTS         | PITG_03215 | Family2038  | PITG_03216 | Family13502 |
|                  | Block EXISTS         | PITG_06506 | Family13502 | PITG_06507 | Family2038  |
| BlockID: Pin_150 | Present              |            |             |            |             |
|                  | Block EXISTS         | PITG_06834 | Family540   | PITG_06835 | Family2132  |
|                  | Block EXISTS         | PITG_20710 | Family2132  | PITG_20711 | Family540   |
| BlockID: Pin_151 | Present              |            |             |            |             |
|                  | Block EXISTS         | PITG_11139 | Family223   | PITG_11140 | Family289   |
|                  | Block EXISTS         | PITG_12940 | Family223   | PITG_12941 | Family289   |
| BlockID: Pin_152 | Present              |            |             |            |             |
|                  | Block EXISTS         | PITG_07822 | Family4836  | PITG_07823 | Family772   |
|                  | Block EXISTS         | PITG_07874 | Family772   | PITG_07875 | Family4836  |
| BlockID: Pin_153 | Dissimilar families  |            |             |            |             |
|                  | Block DOES NOT EXIST | PITG_13955 | Family920   | PITG_13956 | Family2869  |
|                  | Block DOES NOT EXIST | PITG_13957 | Family10186 | PITG_23009 | Family2869  |
| BlockID: Pin_154 | Present              |            |             |            |             |
|                  | Block EXISTS         | PITG_13693 | Family1185  | PITG_13695 | Family232   |
|                  | Block DOES NOT EXIST | PITG_17531 | Family232   | PITG_17535 | Family14234 |
|                  | Block EXISTS         | PITG_17537 | Family232   | PITG_17538 | Family1185  |
| BlockID: Pin_155 | Present              |            |             |            |             |
|                  | Block EXISTS         | PITG_13689 | Family232   | PITG_13690 | Family968   |
|                  | Block EXISTS         | PITG_13696 | Family232   | PITG_13697 | Family968   |
|                  | Block EXISTS         | PITG_17517 | Family232   | PITG_17518 | Family968   |
| BlockID: Pin_156 | Dissimilar families  |            |             |            |             |
|                  | Block DOES NOT EXIST | PITG_16309 | Family9613  | PITG_16310 | Family17378 |
|                  | Block DOES NOT EXIST | PITG_18319 | Family17002 | PITG_18320 | Family9613  |
| BlockID: Pin_157 | Present              |            |             |            |             |
|                  | Block EXISTS         | PITG_13112 | Family53    | PITG_13113 | Family77    |
|                  | Block EXISTS         | PITG_20342 | Family53    | PITG_20344 | Family77    |
| BlockID: Pin_158 | Present              |            |             |            |             |
|                  | Block EXISTS         | PITG_02613 | Family17447 | PITG_02614 | Family10579 |
|                  | Block EXISTS         | PITG_21766 | Family10579 | PITG_21767 | Family17447 |
| BlockID: Pin_159 | Present              |            |             |            |             |
|                  | Block EXISTS         | PITG_05707 | Family1090  | PITG_05708 | Family7890  |
|                  | Block EXISTS         | PITG_18381 | Family7890  | PITG_18382 | Family1090  |
| BlockID: Pin_16  | Present              |            |             |            |             |
|                  | Block EXISTS         | PITG_00729 | Family18064 | PITG_00730 | Family11791 |
|                  | Block EXISTS         | PITG_00735 | Family11791 | PITG_00737 | Family18064 |
| BlockID: Pin_160 | Present              |            |             |            |             |
|                  | Block EXISTS         | PITG_04728 | Family12401 | PITG_04729 | Family1550  |
|                  | Block EXISTS         | PITG_04747 | Family1550  | PITG_04748 | Family12401 |
| BlockID: Pin_161 | Present              |            |             |            |             |
|                  | Block EXISTS         | PITG_04432 | Family12401 | PITG_04434 | Family12402 |

|                  |                      |            |             |            |             |
|------------------|----------------------|------------|-------------|------------|-------------|
|                  | Block EXISTS         | PITG_04436 | Family12402 | PITG_04437 | Family12401 |
| BlockID: Pin_162 | Dissimilar families  |            |             |            |             |
|                  | Block DOES NOT EXIST | PITG_14480 | Family32    | PITG_14481 | Family515   |
|                  | Block DOES NOT EXIST | PITG_14487 | Family515   | PITG_14488 | Family28364 |
| BlockID: Pin_163 | Dissimilar families  |            |             |            |             |
|                  | Block DOES NOT EXIST | PITG_16247 | Family7856  | PITG_16248 | Family9770  |
|                  | Block DOES NOT EXIST | PITG_16424 | Family9755  | PITG_16425 | Family7856  |
|                  | Block DOES NOT EXIST | PITG_20934 | Family2866  | PITG_20935 | Family16761 |
| BlockID: Pin_164 | Dissimilar families  |            |             |            |             |
|                  | Block DOES NOT EXIST | PITG_08422 | Family25    | PITG_08423 | Family675   |
|                  | Block DOES NOT EXIST | PITG_10475 | Family9240  | PITG_10476 | Family1331  |
| BlockID: Pin_165 | Present              |            |             |            |             |
|                  | Block EXISTS         | PITG_01459 | Family432   | PITG_01460 | Family521   |
|                  | Block EXISTS         | PITG_04318 | Family432   | PITG_04319 | Family521   |
|                  | Block EXISTS         | PITG_13964 | Family432   | PITG_13965 | Family521   |
| BlockID: Pin_166 | Dissimilar families  |            |             |            |             |
|                  | Block DOES NOT EXIST | PITG_00421 | Family10893 | PITG_00422 | Family3634  |
|                  | Block DOES NOT EXIST | PITG_21329 | Family3634  | PITG_21330 | Family14208 |
| BlockID: Pin_167 | Present              |            |             |            |             |
|                  | Block EXISTS         | PITG_16239 | Family11103 | PITG_23069 | Family9770  |
|                  | Block EXISTS         | PITG_16421 | Family11103 | PITG_23074 | Family9770  |
| BlockID: Pin_168 | Present              |            |             |            |             |
|                  | Block EXISTS         | PITG_16233 | Family2866  | PITG_16234 | Family2843  |
|                  | Block DOES NOT EXIST | PITG_16240 | Family2866  | PITG_16241 | Family18215 |
|                  | Block EXISTS         | PITG_16245 | Family2866  | PITG_16246 | Family2843  |
|                  | Block EXISTS         | PITG_16408 | Family18215 | PITG_16409 | Family9755  |
|                  | Block EXISTS         | PITG_16426 | Family2843  | PITG_16427 | Family2866  |
|                  | Block EXISTS         | PITG_20936 | Family2866  | PITG_20937 | Family2843  |
| BlockID: Pin_169 | Dissimilar families  |            |             |            |             |
|                  | Block DOES NOT EXIST | PITG_10111 | Family433   | PITG_10112 | Family15660 |
|                  | Block DOES NOT EXIST | PITG_10113 | Family6891  | PITG_23319 | Family9194  |
|                  | Block DOES NOT EXIST | PITG_20942 | Family6891  | PITG_20943 | Family433   |
| BlockID: Pin_17  | Present              |            |             |            |             |
|                  | Block EXISTS         | PITG_01008 | Family11003 | PITG_01009 | Family14417 |
|                  | Block DOES NOT EXIST | PITG_09358 | Family18147 | PITG_09359 | Family11003 |
|                  | Block EXISTS         | PITG_16565 | Family14417 | PITG_16566 | Family11003 |
|                  | Block EXISTS         | PITG_18110 | Family14417 | PITG_18111 | Family11003 |
| BlockID: Pin_170 | Present              |            |             |            |             |
|                  | Block EXISTS         | PITG_09521 | Family2649  | PITG_09522 | Family4367  |
|                  | Block EXISTS         | PITG_09630 | Family4367  | PITG_09631 | Family2649  |
| BlockID: Pin_171 | Present              |            |             |            |             |
|                  | Block EXISTS         | PITG_04184 | Family2     | PITG_04185 | Family6955  |
|                  | Block EXISTS         | PITG_20502 | Family6955  | PITG_20503 | Family2     |
| BlockID: Pin_172 | Dissimilar families  |            |             |            |             |
|                  | Block DOES NOT EXIST | PITG_09795 | Family2739  | PITG_09796 | Family2724  |
|                  | Block DOES NOT EXIST | PITG_10219 | Family2724  | PITG_10220 | Family28158 |
| BlockID: Pin_173 | Present              |            |             |            |             |
|                  | Block EXISTS         | PITG_09777 | Family14461 | PITG_09778 | Family17008 |
|                  | Block EXISTS         | PITG_10610 | Family17008 | PITG_10611 | Family14461 |
| BlockID: Pin_174 | Dissimilar families  |            |             |            |             |
|                  | Block DOES NOT EXIST | PITG_14716 | Family853   | PITG_14717 | Family17759 |
|                  | Block EXISTS         | PITG_19484 | Family206   | PITG_19485 | Family853   |
| BlockID: Pin_175 | Present              |            |             |            |             |
|                  | Block EXISTS         | PITG_06840 | Family10065 | PITG_06841 | Family2422  |
|                  | Block EXISTS         | PITG_20706 | Family2422  | PITG_20707 | Family10065 |
| BlockID: Pin_176 | Present              |            |             |            |             |
|                  | Block EXISTS         | PITG_02617 | Family9702  | PITG_02618 | Family10759 |
|                  | Block EXISTS         | PITG_21762 | Family10759 | PITG_21763 | Family9702  |
| BlockID: Pin_177 | Dissimilar families  |            |             |            |             |
|                  | Block DOES NOT EXIST | PITG_12382 | Family697   | PITG_22961 | Family18243 |

|                  |                      |            |             |            |             |
|------------------|----------------------|------------|-------------|------------|-------------|
|                  | Block DOES NOT EXIST | PITG_12403 | Family28286 | PITG_12404 | Family697   |
|                  | Block DOES NOT EXIST | PITG_12405 | Family1879  | PITG_12409 | Family697   |
| BlockID: Pin_178 | Present              |            |             |            |             |
|                  | Block EXISTS         | PITG_10318 | Family10180 | PITG_10320 | Family58    |
|                  | Block EXISTS         | PITG_19250 | Family58    | PITG_19251 | Family10180 |
| BlockID: Pin_179 | Present              |            |             |            |             |
|                  | Block EXISTS         | PITG_10321 | Family4619  | PITG_10322 | Family481   |
|                  | Block EXISTS         | PITG_19248 | Family481   | PITG_19249 | Family4619  |
| BlockID: Pin_18  | Present              |            |             |            |             |
|                  | Block EXISTS         | PITG_07598 | Family727   | PITG_07599 | Family1251  |
|                  | Block EXISTS         | PITG_18606 | Family1251  | PITG_18607 | Family727   |
| BlockID: Pin_180 | Dissimilar families  |            |             |            |             |
|                  | Block DOES NOT EXIST | PITG_12494 | Family3549  | PITG_12495 | Family10192 |
|                  | Block DOES NOT EXIST | PITG_21214 | Family7696  | PITG_21215 | Family3549  |
| BlockID: Pin_181 | Dissimilar families  |            |             |            |             |
|                  | Block DOES NOT EXIST | PITG_07599 | Family1251  | PITG_07600 | Family23853 |
|                  | Block DOES NOT EXIST | PITG_18605 | Family13619 | PITG_18606 | Family1251  |
| BlockID: Pin_182 | Present              |            |             |            |             |
|                  | Block DOES NOT EXIST | PITG_05062 | Family803   | PITG_05063 | Family1928  |
|                  | Block EXISTS         | PITG_16557 | Family803   | PITG_16558 | Family41    |
|                  | Block EXISTS         | PITG_16559 | Family41    | PITG_16561 | Family803   |
| BlockID: Pin_183 | Present              |            |             |            |             |
|                  | Block EXISTS         | PITG_10429 | Family42    | PITG_10430 | Family120   |
|                  | Block EXISTS         | PITG_10437 | Family120   | PITG_10438 | Family42    |
| BlockID: Pin_184 | Dissimilar families  |            |             |            |             |
|                  | Block DOES NOT EXIST | PITG_05806 | Family1001  | PITG_05807 | Family27942 |
|                  | Block DOES NOT EXIST | PITG_17477 | Family28510 | PITG_17478 | Family28511 |
| BlockID: Pin_185 | Present              |            |             |            |             |
|                  | Block EXISTS         | PITG_01890 | Family805   | PITG_01891 | Family275   |
|                  | Block EXISTS         | PITG_02296 | Family275   | PITG_02297 | Family805   |
|                  | Block EXISTS         | PITG_05028 | Family805   | PITG_05029 | Family275   |
|                  | Block DOES NOT EXIST | PITG_05052 | Family805   | PITG_05053 | Family17545 |
|                  | Block EXISTS         | PITG_09331 | Family805   | PITG_09332 | Family275   |
|                  | Block EXISTS         | PITG_16148 | Family805   | PITG_16149 | Family275   |
|                  | Block EXISTS         | PITG_18558 | Family805   | PITG_18559 | Family275   |
| BlockID: Pin_186 | Dissimilar families  |            |             |            |             |
|                  | Block DOES NOT EXIST | PITG_00229 | Family151   | PITG_00230 | Family5229  |
|                  | Block DOES NOT EXIST | PITG_01290 | Family9910  | PITG_01291 | Family166   |
| BlockID: Pin_187 | Dissimilar families  |            |             |            |             |
|                  | Block DOES NOT EXIST | PITG_18153 | Family18143 | PITG_18155 | Family4661  |
|                  | Block DOES NOT EXIST | PITG_18158 | Family4661  | PITG_18160 | Family16300 |
|                  | Block DOES NOT EXIST | PITG_20365 | Family14487 | PITG_20368 | Family28673 |
| BlockID: Pin_188 | Dissimilar families  |            |             |            |             |
|                  | Block DOES NOT EXIST | PITG_16620 | Family28467 | PITG_16621 | Family435   |
|                  | Block DOES NOT EXIST | PITG_19572 | Family8058  | PITG_19573 | Family28617 |
| BlockID: Pin_189 | Present              |            |             |            |             |
|                  | Block EXISTS         | PITG_00095 | Family76    | PITG_00096 | Family1825  |
|                  | Block EXISTS         | PITG_00102 | Family1825  | PITG_00103 | Family76    |
|                  | Block EXISTS         | PITG_06157 | Family76    | PITG_06158 | Family1825  |
| BlockID: Pin_19  | Dissimilar families  |            |             |            |             |
|                  | Block DOES NOT EXIST | PITG_05058 | Family369   | PITG_05059 | Family1689  |
|                  | Block DOES NOT EXIST | PITG_16556 | Family369   | PITG_16557 | Family803   |
|                  | Block DOES NOT EXIST | PITG_21050 | Family1689  | PITG_21051 | Family12681 |
| BlockID: Pin_190 | Present              |            |             |            |             |
|                  | Block EXISTS         | PITG_00103 | Family76    | PITG_00104 | Family512   |
|                  | Block EXISTS         | PITG_06156 | Family512   | PITG_06157 | Family76    |
| BlockID: Pin_191 | Dissimilar families  |            |             |            |             |
|                  | Block DOES NOT EXIST | PITG_14328 | Family691   | PITG_14330 | Family436   |
|                  | Block DOES NOT EXIST | PITG_18561 | Family436   | PITG_18563 | Family9155  |
| BlockID: Pin_192 | Present              |            |             |            |             |

|                  |                      |            |             |            |             |
|------------------|----------------------|------------|-------------|------------|-------------|
|                  | Block EXISTS         | PITG_02103 | Family368   | PITG_02104 | Family2691  |
|                  | Block EXISTS         | PITG_20675 | Family2691  | PITG_20676 | Family368   |
| BlockID: Pin_193 | Dissimilar families  |            |             |            |             |
|                  | Block DOES NOT EXIST | PITG_08027 | Family368   | PITG_08028 | Family3666  |
|                  | Block DOES NOT EXIST | PITG_19728 | Family3666  | PITG_19729 | Family17347 |
| BlockID: Pin_194 | Present              |            |             |            |             |
|                  | Block DOES NOT EXIST | PITG_07630 | Family4     | PITG_07633 | Family727   |
|                  | Block EXISTS         | PITG_14662 | Family13158 | PITG_14663 | Family727   |
|                  | Block EXISTS         | PITG_14683 | Family727   | PITG_14684 | Family13158 |
| BlockID: Pin_195 | Present              |            |             |            |             |
|                  | Block EXISTS         | PITG_14353 | Family1783  | PITG_14354 | Family2815  |
|                  | Block EXISTS         | PITG_18539 | Family2815  | PITG_18540 | Family1783  |
| BlockID: Pin_196 | Present              |            |             |            |             |
|                  | Block EXISTS         | PITG_15173 | Family9447  | PITG_15174 | Family11871 |
|                  | Block EXISTS         | PITG_20149 | Family11871 | PITG_20152 | Family9447  |
| BlockID: Pin_197 | Present              |            |             |            |             |
|                  | Block EXISTS         | PITG_00418 | Family2159  | PITG_00419 | Family3139  |
|                  | Block EXISTS         | PITG_21334 | Family3139  | PITG_21335 | Family2159  |
| BlockID: Pin_198 | Dissimilar families  |            |             |            |             |
|                  | Block DOES NOT EXIST | PITG_13835 | Family2684  | PITG_13836 | Family15451 |
|                  | Block DOES NOT EXIST | PITG_13838 | Family21122 | PITG_13839 | Family2684  |
| BlockID: Pin_199 | Dissimilar families  |            |             |            |             |
|                  | Block EXISTS         | PITG_08708 | Family1925  | PITG_08709 | Family1926  |
|                  | Block DOES NOT EXIST | PITG_19741 | Family1926  | PITG_19742 | Family15670 |
| BlockID: Pin_2   | Dissimilar families  |            |             |            |             |
|                  | Block DOES NOT EXIST | PITG_12496 | Family27295 | PITG_12497 | Family7344  |
|                  | Block DOES NOT EXIST | PITG_21212 | Family7344  | PITG_21213 | Family13003 |
| BlockID: Pin_20  | Present              |            |             |            |             |
|                  | Block EXISTS         | PITG_14715 | Family57    | PITG_14716 | Family853   |
|                  | Block EXISTS         | PITG_19485 | Family853   | PITG_19486 | Family57    |
| BlockID: Pin_200 | Dissimilar families  |            |             |            |             |
|                  | Block DOES NOT EXIST | PITG_01459 | Family432   | PITG_22683 | Family10746 |
|                  | Block EXISTS         | PITG_13963 | Family320   | PITG_13964 | Family432   |
| BlockID: Pin_201 | Dissimilar families  |            |             |            |             |
|                  | Block DOES NOT EXIST | PITG_12495 | Family10192 | PITG_12496 | Family27295 |
|                  | Block DOES NOT EXIST | PITG_21213 | Family13003 | PITG_21214 | Family7696  |
| BlockID: Pin_202 | Present              |            |             |            |             |
|                  | Block EXISTS         | PITG_15597 | Family18213 | PITG_15598 | Family192   |
|                  | Block EXISTS         | PITG_20662 | Family192   | PITG_20663 | Family18213 |
| BlockID: Pin_203 | Present              |            |             |            |             |
|                  | Block EXISTS         | PITG_17594 | Family1338  | PITG_17595 | Family4476  |
|                  | Block EXISTS         | PITG_21025 | Family4476  | PITG_21026 | Family1338  |
| BlockID: Pin_204 | Present              |            |             |            |             |
|                  | Block EXISTS         | PITG_02435 | Family4617  | PITG_02436 | Family1464  |
|                  | Block EXISTS         | PITG_08079 | Family1464  | PITG_08080 | Family4617  |
| BlockID: Pin_205 | Present              |            |             |            |             |
|                  | Block EXISTS         | PITG_11643 | Family31    | PITG_22946 | Family950   |
|                  | Block EXISTS         | PITG_11646 | Family31    | PITG_22947 | Family950   |
| BlockID: Pin_206 | Present              |            |             |            |             |
|                  | Block EXISTS         | PITG_04089 | Family2868  | PITG_04090 | Family438   |
|                  | Block EXISTS         | PITG_18675 | Family438   | PITG_23138 | Family2868  |
|                  | Block EXISTS         | PITG_18683 | Family438   | PITG_18685 | Family2868  |
|                  | Block EXISTS         | PITG_20303 | Family438   | PITG_23185 | Family2868  |
| BlockID: Pin_207 | Present              |            |             |            |             |
|                  | Block EXISTS         | PITG_09526 | Family2647  | PITG_09527 | Family2646  |
|                  | Block EXISTS         | PITG_09625 | Family2646  | PITG_09626 | Family2647  |
| BlockID: Pin_208 | Present              |            |             |            |             |
|                  | Block EXISTS         | PITG_05020 | Family2586  | PITG_05021 | Family11009 |
|                  | Block EXISTS         | PITG_14326 | Family11009 | PITG_14327 | Family2586  |
|                  | Block EXISTS         | PITG_17181 | Family2586  | PITG_17182 | Family11009 |



|                  |                      |            |             |            |             |
|------------------|----------------------|------------|-------------|------------|-------------|
|                  | Block EXISTS         | PITG_18564 | Family2586  | PITG_18565 | Family11009 |
| BlockID: Pin_209 | Dissimilar families  |            |             |            |             |
|                  | Block DOES NOT EXIST | PITG_04734 | Family488   | PITG_04735 | Family13219 |
|                  | Block DOES NOT EXIST | PITG_04757 | Family13338 | PITG_04758 | Family488   |
|                  | Block DOES NOT EXIST | PITG_04771 | Family488   | PITG_22748 | Family13807 |
|                  | Block DOES NOT EXIST | PITG_04804 | Family488   | PITG_04805 | Family578   |
| BlockID: Pin_21  | Present              |            |             |            |             |
|                  | Block EXISTS         | PITG_14299 | Family4964  | PITG_14300 | Family11649 |
|                  | Block EXISTS         | PITG_16152 | Family11649 | PITG_16153 | Family4964  |
|                  | Block EXISTS         | PITG_18574 | Family11649 | PITG_18575 | Family4964  |
| BlockID: Pin_210 | Dissimilar families  |            |             |            |             |
|                  | Block DOES NOT EXIST | PITG_15587 | Family1166  | PITG_15588 | Family28420 |
|                  | Block DOES NOT EXIST | PITG_18343 | Family12627 | PITG_18344 | Family1166  |
| BlockID: Pin_211 | Present              |            |             |            |             |
|                  | Block EXISTS         | PITG_05712 | Family13134 | PITG_05713 | Family1090  |
|                  | Block EXISTS         | PITG_18382 | Family1090  | PITG_18383 | Family13134 |
| BlockID: Pin_212 | Present              |            |             |            |             |
|                  | Block EXISTS         | PITG_04134 | Family2     | PITG_04135 | Family180   |
|                  | Block EXISTS         | PITG_04156 | Family2     | PITG_04158 | Family180   |
| BlockID: Pin_213 | Present              |            |             |            |             |
|                  | Block EXISTS         | PITG_02163 | Family4754  | PITG_02164 | Family6224  |
|                  | Block EXISTS         | PITG_20294 | Family6224  | PITG_20295 | Family4754  |
| BlockID: Pin_214 | Present              |            |             |            |             |
|                  | Block EXISTS         | PITG_18333 | Family129   | PITG_18334 | Family66    |
|                  | Block EXISTS         | PITG_18338 | Family129   | PITG_18339 | Family66    |
| BlockID: Pin_215 | Present              |            |             |            |             |
|                  | Block EXISTS         | PITG_10620 | Family3021  | PITG_10621 | Family5282  |
|                  | Block EXISTS         | PITG_10624 | Family5282  | PITG_10625 | Family3021  |
| BlockID: Pin_216 | Present              |            |             |            |             |
|                  | Block EXISTS         | PITG_19547 | Family2603  | PITG_19548 | Family4697  |
|                  | Block EXISTS         | PITG_19549 | Family4697  | PITG_19550 | Family2603  |
| BlockID: Pin_217 | Dissimilar families  |            |             |            |             |
|                  | Block DOES NOT EXIST | PITG_05038 | Family10856 | PITG_05039 | Family501   |
|                  | Block DOES NOT EXIST | PITG_14775 | Family736   | PITG_23333 | Family11890 |
|                  | Block DOES NOT EXIST | PITG_17176 | Family501   | PITG_23342 | Family4830  |
| BlockID: Pin_218 | Present              |            |             |            |             |
|                  | Block EXISTS         | PITG_07601 | Family1921  | PITG_07604 | Family523   |
|                  | Block EXISTS         | PITG_07605 | Family523   | PITG_07625 | Family1921  |
| BlockID: Pin_219 | Dissimilar families  |            |             |            |             |
|                  | Block DOES NOT EXIST | PITG_11730 | Family4793  | PITG_11731 | Family469   |
|                  | Block DOES NOT EXIST | PITG_19362 | Family7740  | PITG_19363 | Family4793  |
| BlockID: Pin_22  | Present              |            |             |            |             |
|                  | Block EXISTS         | PITG_09525 | Family4366  | PITG_09526 | Family2647  |
|                  | Block EXISTS         | PITG_09626 | Family2647  | PITG_09627 | Family4366  |
| BlockID: Pin_220 | Dissimilar families  |            |             |            |             |
|                  | Block DOES NOT EXIST | PITG_08283 | Family10400 | PITG_08285 | Family292   |
|                  | Block DOES NOT EXIST | PITG_09121 | Family15967 | PITG_23316 | Family1154  |
| BlockID: Pin_221 | Dissimilar families  |            |             |            |             |
|                  | Block DOES NOT EXIST | PITG_00245 | Family1326  | PITG_00246 | Family9211  |
|                  | Block DOES NOT EXIST | PITG_00247 | Family18060 | PITG_00248 | Family1326  |
| BlockID: Pin_222 | Present              |            |             |            |             |
|                  | Block EXISTS         | PITG_02162 | Family3097  | PITG_02163 | Family4754  |
|                  | Block EXISTS         | PITG_20295 | Family4754  | PITG_20296 | Family3097  |
| BlockID: Pin_223 | Present              |            |             |            |             |
|                  | Block EXISTS         | PITG_13691 | Family13816 | PITG_13692 | Family12019 |
|                  | Block EXISTS         | PITG_14034 | Family12019 | PITG_14036 | Family13816 |
| BlockID: Pin_224 | Dissimilar families  |            |             |            |             |
|                  | Block DOES NOT EXIST | PITG_01686 | Family18075 | PITG_01687 | Family10715 |
|                  | Block DOES NOT EXIST | PITG_16305 | Family12019 | PITG_16306 | Family12281 |
| BlockID: Pin_225 | Dissimilar families  |            |             |            |             |

|                                      |                      |            |             |            |             |
|--------------------------------------|----------------------|------------|-------------|------------|-------------|
|                                      | Block DOES NOT EXIST | PITG_04201 | Family27872 | PITG_04202 | Family434   |
|                                      | Block DOES NOT EXIST | PITG_04213 | Family434   | PITG_04214 | Family7869  |
| BlockID: Pin_226 Dissimilar families |                      |            |             |            |             |
|                                      | Block DOES NOT EXIST | PITG_16288 | Family14484 | PITG_16289 | Family18217 |
|                                      | Block DOES NOT EXIST | PITG_16651 | Family14484 | PITG_16652 | Family14485 |
|                                      | Block DOES NOT EXIST | PITG_16942 | Family11716 | PITG_16943 | Family14485 |
|                                      | Block DOES NOT EXIST | PITG_19283 | Family11716 | PITG_19284 | Family18223 |
| BlockID: Pin_227 Present             |                      |            |             |            |             |
|                                      | Block EXISTS         | PITG_04760 | Family578   | PITG_23247 | Family760   |
|                                      | Block EXISTS         | PITG_04763 | Family578   | PITG_23249 | Family760   |
|                                      | Block EXISTS         | PITG_04764 | Family578   | PITG_23250 | Family760   |
|                                      | Block EXISTS         | PITG_04766 | Family578   | PITG_23251 | Family760   |
|                                      | Block EXISTS         | PITG_04767 | Family578   | PITG_23252 | Family760   |
|                                      | Block EXISTS         | PITG_04769 | Family578   | PITG_23254 | Family760   |
|                                      | Block EXISTS         | PITG_04770 | Family578   | PITG_23255 | Family760   |
|                                      | Block EXISTS         | PITG_04798 | Family760   | PITG_04799 | Family578   |
|                                      | Block DOES NOT EXIST | PITG_04812 | Family578   | PITG_23258 | Family18107 |
|                                      | Block EXISTS         | PITG_04965 | Family578   | PITG_04966 | Family760   |
|                                      | Block EXISTS         | PITG_12073 | Family760   | PITG_12074 | Family578   |
|                                      | Block EXISTS         | PITG_21734 | Family578   | PITG_23291 | Family760   |
|                                      | Block DOES NOT EXIST | PITG_21736 | Family760   | PITG_23294 | Family28936 |
|                                      | Block DOES NOT EXIST | PITG_23261 | Family18107 | PITG_23262 | Family13907 |
|                                      | Block EXISTS         | PITG_23263 | Family760   | PITG_23264 | Family9796  |
|                                      | Block EXISTS         | PITG_23267 | Family9796  | PITG_23268 | Family760   |
|                                      | Block EXISTS         | PITG_23292 | Family760   | PITG_23293 | Family9796  |
| BlockID: Pin_228 Present             |                      |            |             |            |             |
|                                      | Block EXISTS         | PITG_07644 | Family3763  | PITG_07645 | Family3419  |
|                                      | Block EXISTS         | PITG_18695 | Family3419  | PITG_18696 | Family3763  |
| BlockID: Pin_229 Dissimilar families |                      |            |             |            |             |
|                                      | Block DOES NOT EXIST | PITG_16601 | Family11865 | PITG_23085 | Family17884 |
|                                      | Block DOES NOT EXIST | PITG_19346 | Family11865 | PITG_19347 | Family147   |
| BlockID: Pin_23 Present              |                      |            |             |            |             |
|                                      | Block EXISTS         | PITG_04207 | Family134   | PITG_04208 | Family7     |
|                                      | Block EXISTS         | PITG_04254 | Family134   | PITG_22734 | Family7     |
|                                      | Block EXISTS         | PITG_19938 | Family7     | PITG_19939 | Family134   |
| BlockID: Pin_230 Present             |                      |            |             |            |             |
|                                      | Block DOES NOT EXIST | PITG_12090 | Family435   | PITG_22955 | Family26836 |
|                                      | Block EXISTS         | PITG_12642 | Family147   | PITG_12643 | Family721   |
|                                      | Block EXISTS         | PITG_12645 | Family147   | PITG_12646 | Family435   |
|                                      | Block EXISTS         | PITG_16580 | Family721   | PITG_16581 | Family147   |
|                                      | Block EXISTS         | PITG_16584 | Family147   | PITG_16585 | Family435   |
|                                      | Block EXISTS         | PITG_16589 | Family147   | PITG_23083 | Family18274 |
|                                      | Block EXISTS         | PITG_16592 | Family721   | PITG_16593 | Family147   |
|                                      | Block DOES NOT EXIST | PITG_16596 | Family28465 | PITG_23283 | Family147   |
|                                      | Block EXISTS         | PITG_16597 | Family147   | PITG_23084 | Family721   |
|                                      | Block DOES NOT EXIST | PITG_16598 | Family147   | PITG_16599 | Family9792  |
|                                      | Block DOES NOT EXIST | PITG_16609 | Family721   | PITG_23086 | Family1010  |
|                                      | Block EXISTS         | PITG_16615 | Family147   | PITG_16616 | Family8058  |
|                                      | Block EXISTS         | PITG_16618 | Family435   | PITG_16619 | Family147   |
|                                      | Block EXISTS         | PITG_16621 | Family435   | PITG_16622 | Family147   |
|                                      | Block EXISTS         | PITG_16624 | Family147   | PITG_16626 | Family721   |
|                                      | Block EXISTS         | PITG_16635 | Family147   | PITG_16636 | Family435   |
|                                      | Block DOES NOT EXIST | PITG_17624 | Family147   | PITG_17625 | Family1560  |
|                                      | Block EXISTS         | PITG_18821 | Family147   | PITG_18822 | Family721   |
|                                      | Block DOES NOT EXIST | PITG_18823 | Family147   | PITG_18826 | Family233   |
|                                      | Block EXISTS         | PITG_19334 | Family147   | PITG_23155 | Family721   |
|                                      | Block DOES NOT EXIST | PITG_19567 | Family8058  | PITG_19568 | Family12064 |
|                                      | Block EXISTS         | PITG_19571 | Family147   | PITG_19572 | Family8058  |
|                                      | Block EXISTS         | PITG_19574 | Family721   | PITG_23165 | Family147   |
|                                      | Block EXISTS         | PITG_19577 | Family721   | PITG_19578 | Family147   |

|                                         |                      |            |             |            |             |
|-----------------------------------------|----------------------|------------|-------------|------------|-------------|
|                                         | Block EXISTS         | PITG_19588 | Family147   | PITG_23168 | Family18274 |
|                                         | Block EXISTS         | PITG_23088 | Family147   | PITG_23089 | Family435   |
|                                         | Block EXISTS         | PITG_23163 | Family721   | PITG_23164 | Family147   |
| BlockID: Pin_231 Present                |                      |            |             |            |             |
|                                         | Block DOES NOT EXIST | PITG_12091 | Family1010  | PITG_12092 | Family2826  |
|                                         | Block EXISTS         | PITG_16589 | Family147   | PITG_16591 | Family2827  |
|                                         | Block DOES NOT EXIST | PITG_16600 | Family147   | PITG_23284 | Family28934 |
|                                         | Block DOES NOT EXIST | PITG_16624 | Family147   | PITG_23286 | Family13487 |
|                                         | Block DOES NOT EXIST | PITG_19579 | Family147   | PITG_19581 | Family2826  |
|                                         | Block DOES NOT EXIST | PITG_19586 | Family2826  | PITG_19588 | Family147   |
|                                         | Block EXISTS         | PITG_20168 | Family2827  | PITG_20169 | Family147   |
| BlockID: Pin_232 Present                |                      |            |             |            |             |
|                                         | Block EXISTS         | PITG_16660 | Family8347  | PITG_16661 | Family887   |
|                                         | Block EXISTS         | PITG_18774 | Family887   | PITG_18775 | Family8347  |
| BlockID: Pin_233 Present                |                      |            |             |            |             |
|                                         | Block EXISTS         | PITG_04139 | Family12273 | PITG_22729 | Family18207 |
|                                         | Block EXISTS         | PITG_04148 | Family12273 | PITG_22730 | Family18207 |
| BlockID: Pin_234 Dissimilar families    |                      |            |             |            |             |
|                                         | Block DOES NOT EXIST | PITG_04777 | Family6567  | PITG_04778 | Family13807 |
|                                         | Block DOES NOT EXIST | PITG_04799 | Family578   | PITG_04800 | Family6567  |
| BlockID: Pin_235 Present                |                      |            |             |            |             |
|                                         | Block EXISTS         | PITG_14024 | Family9264  | PITG_14025 | Family1731  |
|                                         | Block EXISTS         | PITG_17174 | Family1731  | PITG_17175 | Family9264  |
| BlockID: Pin_236 Dissimilar families    |                      |            |             |            |             |
|                                         | Block DOES NOT EXIST | PITG_07463 | Family28013 | PITG_07464 | Family28014 |
|                                         | Block DOES NOT EXIST | PITG_07473 | Family4725  | PITG_07474 | Family11884 |
| BlockID: Pin_237 Present                |                      |            |             |            |             |
|                                         | Block EXISTS         | PITG_14494 | Family11019 | PITG_14496 | Family1785  |
|                                         | Block EXISTS         | PITG_19489 | Family1785  | PITG_19491 | Family11019 |
| BlockID: Pin_238 Present (diff. copies) |                      |            |             |            |             |
|                                         | Block DOES NOT EXIST | PITG_11719 | Family1417  | PITG_11720 | Family4310  |
|                                         | Block EXISTS         | PITG_19901 | Family4310  | PITG_19902 | Family18174 |
| BlockID: Pin_239 Present                |                      |            |             |            |             |
|                                         | Block EXISTS         | PITG_14298 | Family800   | PITG_14299 | Family4964  |
|                                         | Block EXISTS         | PITG_16153 | Family4964  | PITG_16154 | Family800   |
|                                         | Block EXISTS         | PITG_18575 | Family4964  | PITG_18576 | Family800   |
| BlockID: Pin_24 Dissimilar families     |                      |            |             |            |             |
|                                         | Block DOES NOT EXIST | PITG_08518 | Family7     | PITG_08519 | Family13527 |
|                                         | Block DOES NOT EXIST | PITG_08521 | Family1224  | PITG_08522 | Family7     |
| BlockID: Pin_240 Present                |                      |            |             |            |             |
|                                         | Block EXISTS         | PITG_17645 | Family4661  | PITG_17646 | Family11678 |
|                                         | Block EXISTS         | PITG_18157 | Family11678 | PITG_18158 | Family4661  |
| BlockID: Pin_241 Present                |                      |            |             |            |             |
|                                         | Block EXISTS         | PITG_03205 | Family809   | PITG_03206 | Family6875  |
|                                         | Block EXISTS         | PITG_21601 | Family6875  | PITG_21602 | Family809   |
| BlockID: Pin_242 Present                |                      |            |             |            |             |
|                                         | Block EXISTS         | PITG_07376 | Family6     | PITG_07377 | Family3219  |
|                                         | Block EXISTS         | PITG_11545 | Family3219  | PITG_11546 | Family6     |
| BlockID: Pin_243 Dissimilar families    |                      |            |             |            |             |
|                                         | Block DOES NOT EXIST | PITG_07600 | Family23853 | PITG_07601 | Family1921  |
|                                         | Block DOES NOT EXIST | PITG_18604 | Family1921  | PITG_18605 | Family13619 |
| BlockID: Pin_244 Present                |                      |            |             |            |             |
|                                         | Block EXISTS         | PITG_05577 | Family204   | PITG_05578 | Family350   |
|                                         | Block EXISTS         | PITG_05579 | Family350   | PITG_05580 | Family204   |
| BlockID: Pin_245 Dissimilar families    |                      |            |             |            |             |
|                                         | Block DOES NOT EXIST | PITG_12816 | Family28304 | PITG_12817 | Family6     |
|                                         | Block DOES NOT EXIST | PITG_15165 | Family6     | PITG_15166 | Family18135 |
| BlockID: Pin_246 Present                |                      |            |             |            |             |
|                                         | Block EXISTS         | PITG_08623 | Family8211  | PITG_08624 | Family10950 |
|                                         | Block EXISTS         | PITG_20616 | Family10950 | PITG_20617 | Family8211  |

|                  |                     |                      |            |             |            |             |
|------------------|---------------------|----------------------|------------|-------------|------------|-------------|
| BlockID: Pin_247 | Present             |                      |            |             |            |             |
|                  |                     | Block EXISTS         | PITG_05072 | Family11409 | PITG_05074 | Family4     |
|                  |                     | Block EXISTS         | PITG_19307 | Family4     | PITG_19308 | Family11409 |
|                  |                     | Block DOES NOT EXIST | PITG_22879 | Family4     | PITG_22880 | Family4     |
| BlockID: Pin_248 | Dissimilar families |                      |            |             |            |             |
|                  |                     | Block DOES NOT EXIST | PITG_05058 | Family369   | PITG_22754 | Family13869 |
|                  |                     | Block DOES NOT EXIST | PITG_16556 | Family369   | PITG_23078 | Family544   |
|                  |                     | Block DOES NOT EXIST | PITG_17205 | Family369   | PITG_23105 | Family12051 |
| BlockID: Pin_249 | Present             |                      |            |             |            |             |
|                  |                     | Block EXISTS         | PITG_09523 | Family2094  | PITG_09524 | Family2648  |
|                  |                     | Block EXISTS         | PITG_09628 | Family2648  | PITG_09629 | Family2094  |
| BlockID: Pin_25  | Present             |                      |            |             |            |             |
|                  |                     | Block EXISTS         | PITG_12361 | Family230   | PITG_12362 | Family697   |
|                  |                     | Block EXISTS         | PITG_12399 | Family697   | PITG_12401 | Family230   |
| BlockID: Pin_250 | Present             |                      |            |             |            |             |
|                  |                     | Block EXISTS         | PITG_13809 | Family23    | PITG_23006 | Family399   |
|                  |                     | Block EXISTS         | PITG_13825 | Family23    | PITG_13826 | Family399   |
| BlockID: Pin_251 | Dissimilar families |                      |            |             |            |             |
|                  |                     | Block DOES NOT EXIST | PITG_03072 | Family27824 | PITG_03073 | Family557   |
|                  |                     | Block DOES NOT EXIST | PITG_18620 | Family28569 | PITG_18621 | Family28570 |
| BlockID: Pin_252 | Present             |                      |            |             |            |             |
|                  |                     | Block EXISTS         | PITG_15374 | Family2236  | PITG_15375 | Family11289 |
|                  |                     | Block EXISTS         | PITG_18920 | Family11289 | PITG_18922 | Family2236  |
| BlockID: Pin_253 | Dissimilar families |                      |            |             |            |             |
|                  |                     | Block DOES NOT EXIST | PITG_16591 | Family2827  | PITG_16592 | Family721   |
|                  |                     | Block DOES NOT EXIST | PITG_16599 | Family9792  | PITG_23284 | Family28934 |
|                  |                     | Block DOES NOT EXIST | PITG_19581 | Family2826  | PITG_23167 | Family1621  |
|                  |                     | Block DOES NOT EXIST | PITG_20167 | Family9792  | PITG_20168 | Family2827  |
|                  |                     | Block DOES NOT EXIST | PITG_23273 | Family2827  | PITG_23274 | Family435   |
| BlockID: Pin_26  | Dissimilar families |                      |            |             |            |             |
|                  |                     | Block DOES NOT EXIST | PITG_00093 | Family512   | PITG_00094 | Family18057 |
|                  |                     | Block DOES NOT EXIST | PITG_00100 | Family512   | PITG_00101 | Family8917  |
| BlockID: Pin_27  | Present             |                      |            |             |            |             |
|                  |                     | Block EXISTS         | PITG_12955 | Family542   | PITG_12956 | Family6905  |
|                  |                     | Block EXISTS         | PITG_12963 | Family6905  | PITG_12964 | Family542   |
| BlockID: Pin_28  | Present             |                      |            |             |            |             |
|                  |                     | Block EXISTS         | PITG_02657 | Family724   | PITG_02658 | Family725   |
|                  |                     | Block EXISTS         | PITG_03867 | Family725   | PITG_03868 | Family724   |
| BlockID: Pin_29  | Present             |                      |            |             |            |             |
|                  |                     | Block EXISTS         | PITG_12910 | Family353   | PITG_12911 | Family9486  |
|                  |                     | Block EXISTS         | PITG_20228 | Family9486  | PITG_20229 | Family353   |
| BlockID: Pin_3   | Dissimilar families |                      |            |             |            |             |
|                  |                     | Block DOES NOT EXIST | PITG_13218 | Family384   | PITG_13220 | Family4799  |
|                  |                     | Block DOES NOT EXIST | PITG_17100 | Family16925 | PITG_17101 | Family384   |
|                  |                     | Block DOES NOT EXIST | PITG_17915 | Family384   | PITG_17918 | Family10716 |
| BlockID: Pin_30  | Dissimilar families |                      |            |             |            |             |
|                  |                     | Block DOES NOT EXIST | PITG_04092 | Family873   | PITG_04093 | Family15413 |
|                  |                     | Block DOES NOT EXIST | PITG_18677 | Family13534 | PITG_18678 | Family873   |
| BlockID: Pin_31  | Present             |                      |            |             |            |             |
|                  |                     | Block EXISTS         | PITG_07650 | Family7408  | PITG_07651 | Family2405  |
|                  |                     | Block EXISTS         | PITG_18688 | Family2405  | PITG_18689 | Family7408  |
| BlockID: Pin_32  | Dissimilar families |                      |            |             |            |             |
|                  |                     | Block DOES NOT EXIST | PITG_07572 | Family3737  | PITG_07573 | Family240   |
|                  |                     | Block DOES NOT EXIST | PITG_19978 | Family6864  | PITG_19979 | Family3737  |
| BlockID: Pin_33  | Present             |                      |            |             |            |             |
|                  |                     | Block EXISTS         | PITG_00097 | Family8362  | PITG_00098 | Family8917  |
|                  |                     | Block EXISTS         | PITG_06159 | Family8362  | PITG_06160 | Family8917  |
|                  |                     | Block DOES NOT EXIST | PITG_21534 | Family16997 | PITG_21535 | Family18057 |
| BlockID: Pin_34  | Dissimilar families |                      |            |             |            |             |
|                  |                     | Block DOES NOT EXIST | PITG_03904 | Family5208  | PITG_03905 | Family9593  |

|                 |                     |                      |            |             |            |             |
|-----------------|---------------------|----------------------|------------|-------------|------------|-------------|
|                 |                     | Block DOES NOT EXIST | PITG_17638 | Family9593  | PITG_17639 | Family12696 |
| BlockID: Pin_35 | Present             |                      |            |             |            |             |
|                 |                     | Block EXISTS         | PITG_10572 | Family74    | PITG_10573 | Family2653  |
|                 |                     | Block EXISTS         | PITG_21128 | Family2653  | PITG_21129 | Family74    |
| BlockID: Pin_36 | Dissimilar families |                      |            |             |            |             |
|                 |                     | Block DOES NOT EXIST | PITG_17852 | Family8     | PITG_17853 | Family472   |
|                 |                     | Block DOES NOT EXIST | PITG_17856 | Family1793  | PITG_17857 | Family8     |
|                 |                     | Block DOES NOT EXIST | PITG_19031 | Family13037 | PITG_19032 | Family472   |
| BlockID: Pin_37 | Dissimilar families |                      |            |             |            |             |
|                 |                     | Block DOES NOT EXIST | PITG_07362 | Family6385  | PITG_07363 | Family232   |
|                 |                     | Block DOES NOT EXIST | PITG_13708 | Family920   | PITG_13709 | Family6385  |
| BlockID: Pin_38 | Dissimilar families |                      |            |             |            |             |
|                 |                     | Block DOES NOT EXIST | PITG_12003 | Family14065 | PITG_12004 | Family4026  |
|                 |                     | Block DOES NOT EXIST | PITG_17967 | Family1627  | PITG_17968 | Family4026  |
| BlockID: Pin_39 | Dissimilar families |                      |            |             |            |             |
|                 |                     | Block DOES NOT EXIST | PITG_15393 | Family3441  | PITG_15394 | Family216   |
|                 |                     | Block DOES NOT EXIST | PITG_21282 | Family28719 | PITG_21283 | Family28720 |
| BlockID: Pin_4  | Present             |                      |            |             |            |             |
|                 |                     | Block EXISTS         | PITG_01634 | Family348   | PITG_01635 | Family655   |
|                 |                     | Block EXISTS         | PITG_01892 | Family655   | PITG_01893 | Family348   |
|                 |                     | Block DOES NOT EXIST | PITG_02295 | Family16926 | PITG_02296 | Family275   |
|                 |                     | Block EXISTS         | PITG_04414 | Family275   | PITG_04415 | Family10716 |
|                 |                     | Block EXISTS         | PITG_05029 | Family275   | PITG_05030 | Family348   |
|                 |                     | Block EXISTS         | PITG_05033 | Family348   | PITG_05034 | Family275   |
|                 |                     | Block EXISTS         | PITG_05054 | Family655   | PITG_05055 | Family348   |
|                 |                     | Block EXISTS         | PITG_09332 | Family275   | PITG_09333 | Family348   |
|                 |                     | Block EXISTS         | PITG_10585 | Family275   | PITG_10586 | Family348   |
|                 |                     | Block EXISTS         | PITG_12370 | Family348   | PITG_12371 | Family655   |
|                 |                     | Block EXISTS         | PITG_12388 | Family348   | PITG_12389 | Family275   |
|                 |                     | Block EXISTS         | PITG_14331 | Family348   | PITG_14332 | Family275   |
|                 |                     | Block EXISTS         | PITG_14335 | Family348   | PITG_14336 | Family655   |
|                 |                     | Block EXISTS         | PITG_16149 | Family275   | PITG_16150 | Family348   |
|                 |                     | Block EXISTS         | PITG_18493 | Family348   | PITG_18494 | Family275   |
|                 |                     | Block EXISTS         | PITG_18559 | Family275   | PITG_18560 | Family348   |
|                 |                     | Block EXISTS         | PITG_19388 | Family10716 | PITG_19389 | Family275   |
| BlockID: Pin_40 | Dissimilar families |                      |            |             |            |             |
|                 |                     | Block DOES NOT EXIST | PITG_02598 | Family10976 | PITG_02599 | Family6236  |
|                 |                     | Block DOES NOT EXIST | PITG_20718 | Family6236  | PITG_20719 | Family28686 |
| BlockID: Pin_41 | Dissimilar families |                      |            |             |            |             |
|                 |                     | Block DOES NOT EXIST | PITG_12930 | Family1604  | PITG_12931 | Family1770  |
|                 |                     | Block DOES NOT EXIST | PITG_12932 | Family1770  | PITG_12933 | Family28307 |
| BlockID: Pin_42 | Dissimilar families |                      |            |             |            |             |
|                 |                     | Block DOES NOT EXIST | PITG_12620 | Family11153 | PITG_12621 | Family13395 |
|                 |                     | Block DOES NOT EXIST | PITG_18757 | Family16303 | PITG_18758 | Family14485 |
| BlockID: Pin_43 | Present             |                      |            |             |            |             |
|                 |                     | Block EXISTS         | PITG_06057 | Family6785  | PITG_06059 | Family13943 |
|                 |                     | Block EXISTS         | PITG_06074 | Family13943 | PITG_06075 | Family6785  |
| BlockID: Pin_44 | Present             |                      |            |             |            |             |
|                 |                     | Block EXISTS         | PITG_18207 | Family867   | PITG_18208 | Family55    |
|                 |                     | Block EXISTS         | PITG_18231 | Family55    | PITG_18232 | Family867   |
| BlockID: Pin_45 | Present             |                      |            |             |            |             |
|                 |                     | Block EXISTS         | PITG_02102 | Family731   | PITG_02103 | Family368   |
|                 |                     | Block EXISTS         | PITG_20676 | Family368   | PITG_20677 | Family731   |
| BlockID: Pin_46 | Dissimilar families |                      |            |             |            |             |
|                 |                     | Block DOES NOT EXIST | PITG_09350 | Family24    | PITG_09351 | Family1220  |
|                 |                     | Block DOES NOT EXIST | PITG_09352 | Family72    | PITG_09354 | Family24    |
| BlockID: Pin_47 | Dissimilar families |                      |            |             |            |             |
|                 |                     | Block DOES NOT EXIST | PITG_09204 | Family24    | PITG_09206 | Family13211 |
|                 |                     | Block DOES NOT EXIST | PITG_09207 | Family11571 | PITG_09208 | Family24    |
| BlockID: Pin_48 | Present             |                      |            |             |            |             |

|                 |                        |            |             |            |             |
|-----------------|------------------------|------------|-------------|------------|-------------|
|                 | Block EXISTS           | PITG_09197 | Family24    | PITG_09198 | Family174   |
|                 | Block EXISTS           | PITG_09201 | Family174   | PITG_09203 | Family24    |
| BlockID: Pin_49 | Dissimilar families    |            |             |            |             |
|                 | Block DOES NOT EXIST   | PITG_09775 | Family28142 | PITG_09777 | Family14461 |
|                 | Block DOES NOT EXIST   | PITG_10611 | Family14461 | PITG_10612 | Family17864 |
| BlockID: Pin_5  | Present                |            |             |            |             |
|                 | Block EXISTS           | PITG_01893 | Family348   | PITG_01894 | Family436   |
|                 | Block EXISTS           | PITG_05030 | Family348   | PITG_05032 | Family436   |
|                 | Block EXISTS           | PITG_14330 | Family436   | PITG_14331 | Family348   |
|                 | Block EXISTS           | PITG_14334 | Family436   | PITG_14335 | Family348   |
|                 | Block EXISTS           | PITG_18560 | Family348   | PITG_18561 | Family436   |
| BlockID: Pin_50 | Present                |            |             |            |             |
|                 | Block EXISTS           | PITG_07365 | Family6464  | PITG_07366 | Family1380  |
|                 | Block EXISTS           | PITG_11536 | Family1380  | PITG_11537 | Family6464  |
| BlockID: Pin_51 | Present                |            |             |            |             |
|                 | Block EXISTS           | PITG_18411 | Family3950  | PITG_18412 | Family1883  |
|                 | Block EXISTS           | PITG_18432 | Family1883  | PITG_18433 | Family3950  |
| BlockID: Pin_52 | Present                |            |             |            |             |
|                 | Block EXISTS           | PITG_02615 | Family2671  | PITG_02616 | Family224   |
|                 | Block EXISTS           | PITG_21764 | Family224   | PITG_21765 | Family2671  |
| BlockID: Pin_53 | Dissimilar families    |            |             |            |             |
|                 | Block DOES NOT EXIST   | PITG_17592 | Family2697  | PITG_17593 | Family1940  |
|                 | Block DOES NOT EXIST   | PITG_21027 | Family1940  | PITG_21028 | Family28704 |
| BlockID: Pin_54 | Present                |            |             |            |             |
|                 | Block DOES NOT EXIST   | PITG_04738 | Family13338 | PITG_04739 | Family18100 |
|                 | Block DOES NOT EXIST   | PITG_04756 | Family695   | PITG_04757 | Family13338 |
|                 | Block EXISTS           | PITG_04759 | Family695   | PITG_04760 | Family578   |
|                 | Block DOES NOT EXIST   | PITG_04778 | Family13807 | PITG_04779 | Family13551 |
|                 | Block DOES NOT EXIST   | PITG_04783 | Family10356 | PITG_04786 | Family695   |
|                 | Block EXISTS           | PITG_04807 | Family695   | PITG_04809 | Family578   |
|                 | Block DOES NOT EXIST   | PITG_04811 | Family18100 | PITG_23257 | Family9796  |
| BlockID: Pin_55 | Present                |            |             |            |             |
|                 | Block EXISTS           | PITG_14497 | Family2701  | PITG_14498 | Family2700  |
|                 | Block EXISTS           | PITG_19487 | Family2700  | PITG_19488 | Family2701  |
| BlockID: Pin_56 | Present                |            |             |            |             |
|                 | Block EXISTS           | PITG_16246 | Family2843  | PITG_16247 | Family7856  |
|                 | Block EXISTS           | PITG_16425 | Family7856  | PITG_16426 | Family2843  |
| BlockID: Pin_57 | Present                |            |             |            |             |
|                 | Block EXISTS           | PITG_00417 | Family5069  | PITG_00418 | Family2159  |
|                 | Block EXISTS           | PITG_21335 | Family2159  | PITG_21336 | Family5069  |
| BlockID: Pin_58 | Present (diff. copies) |            |             |            |             |
|                 | Block EXISTS           | PITG_07750 | Family14450 | PITG_07751 | Family8994  |
|                 | Block DOES NOT EXIST   | PITG_07752 | Family14450 | PITG_22833 | Family722   |
| BlockID: Pin_59 | Present                |            |             |            |             |
|                 | Block EXISTS           | PITG_05034 | Family275   | PITG_05035 | Family11000 |
|                 | Block EXISTS           | PITG_10584 | Family384   | PITG_10585 | Family275   |
|                 | Block DOES NOT EXIST   | PITG_12371 | Family655   | PITG_12372 | Family384   |
|                 | Block EXISTS           | PITG_12413 | Family384   | PITG_12414 | Family275   |
|                 | Block EXISTS           | PITG_14337 | Family275   | PITG_14338 | Family11000 |
|                 | Block EXISTS           | PITG_18494 | Family275   | PITG_18495 | Family384   |
| BlockID: Pin_6  | Present                |            |             |            |             |
|                 | Block EXISTS           | PITG_06976 | Family356   | PITG_06977 | Family3743  |
|                 | Block EXISTS           | PITG_20614 | Family3743  | PITG_20615 | Family356   |
| BlockID: Pin_60 | Present                |            |             |            |             |
|                 | Block EXISTS           | PITG_03214 | Family10517 | PITG_03215 | Family2038  |
|                 | Block EXISTS           | PITG_06507 | Family2038  | PITG_06508 | Family10517 |
| BlockID: Pin_61 | Dissimilar families    |            |             |            |             |
|                 | Block DOES NOT EXIST   | PITG_01157 | Family27736 | PITG_01158 | Family3959  |
|                 | Block DOES NOT EXIST   | PITG_19198 | Family3959  | PITG_19199 | Family2994  |
| BlockID: Pin_62 | Present                |            |             |            |             |

|                 |                      |            |             |            |             |
|-----------------|----------------------|------------|-------------|------------|-------------|
|                 | Block EXISTS         | PITG_13098 | Family6639  | PITG_13100 | Family452   |
|                 | Block EXISTS         | PITG_20417 | Family452   | PITG_20419 | Family6639  |
| BlockID: Pin_63 | Present              |            |             |            |             |
|                 | Block EXISTS         | PITG_09887 | Family499   | PITG_09888 | Family1002  |
|                 | Block EXISTS         | PITG_09889 | Family1002  | PITG_09890 | Family499   |
| BlockID: Pin_64 | Present              |            |             |            |             |
|                 | Block EXISTS         | PITG_15791 | Family55    | PITG_15792 | Family6676  |
|                 | Block EXISTS         | PITG_18209 | Family55    | PITG_18210 | Family6676  |
|                 | Block EXISTS         | PITG_18229 | Family6676  | PITG_18230 | Family55    |
| BlockID: Pin_65 | One family           |            |             |            |             |
|                 | Block DOES NOT EXIST | PITG_10257 | Family271   | PITG_10258 | Family271   |
|                 | Block DOES NOT EXIST | PITG_10389 | Family271   | PITG_10390 | Family271   |
| BlockID: Pin_66 | Dissimilar families  |            |             |            |             |
|                 | Block DOES NOT EXIST | PITG_14402 | Family6125  | PITG_14403 | Family212   |
|                 | Block DOES NOT EXIST | PITG_20622 | Family212   | PITG_20623 | Family28681 |
| BlockID: Pin_67 | Present              |            |             |            |             |
|                 | Block EXISTS         | PITG_06197 | Family3592  | PITG_06198 | Family2082  |
|                 | Block EXISTS         | PITG_16123 | Family2082  | PITG_16124 | Family3592  |
| BlockID: Pin_68 | Present              |            |             |            |             |
|                 | Block EXISTS         | PITG_14043 | Family1680  | PITG_14044 | Family1406  |
|                 | Block DOES NOT EXIST | PITG_18872 | Family18236 | PITG_18873 | Family1680  |
|                 | Block EXISTS         | PITG_18882 | Family1406  | PITG_18883 | Family1680  |
| BlockID: Pin_69 | Dissimilar families  |            |             |            |             |
|                 | Block DOES NOT EXIST | PITG_14296 | Family1681  | PITG_14297 | Family13719 |
|                 | Block DOES NOT EXIST | PITG_16154 | Family800   | PITG_16155 | Family11957 |
| BlockID: Pin_7  | Present              |            |             |            |             |
|                 | Block DOES NOT EXIST | PITG_05045 | Family722   | PITG_05048 | Family9789  |
|                 | Block EXISTS         | PITG_14309 | Family501   | PITG_14310 | Family600   |
|                 | Block EXISTS         | PITG_14312 | Family600   | PITG_14314 | Family722   |
|                 | Block EXISTS         | PITG_14315 | Family600   | PITG_14319 | Family736   |
|                 | Block EXISTS         | PITG_14343 | Family501   | PITG_14344 | Family600   |
|                 | Block EXISTS         | PITG_14351 | Family501   | PITG_14352 | Family600   |
|                 | Block DOES NOT EXIST | PITG_14775 | Family736   | PITG_14777 | Family9789  |
|                 | Block EXISTS         | PITG_17187 | Family600   | PITG_17189 | Family722   |
|                 | Block EXISTS         | PITG_17198 | Family9789  | PITG_17199 | Family264   |
|                 | Block EXISTS         | PITG_18545 | Family600   | PITG_18546 | Family501   |
|                 | Block EXISTS         | PITG_18553 | Family600   | PITG_18554 | Family501   |
|                 | Block EXISTS         | PITG_19375 | Family12427 | PITG_19377 | Family722   |
|                 | Block EXISTS         | PITG_19394 | Family501   | PITG_19399 | Family600   |
|                 | Block EXISTS         | PITG_20640 | Family600   | PITG_20641 | Family501   |
| BlockID: Pin_70 | Present              |            |             |            |             |
|                 | Block EXISTS         | PITG_07148 | Family86    | PITG_07149 | Family45    |
|                 | Block EXISTS         | PITG_07152 | Family86    | PITG_07153 | Family45    |
|                 | Block DOES NOT EXIST | PITG_07182 | Family10047 | PITG_07183 | Family9291  |
| BlockID: Pin_71 | Present              |            |             |            |             |
|                 | Block EXISTS         | PITG_01888 | Family4797  | PITG_01889 | Family384   |
|                 | Block EXISTS         | PITG_05035 | Family11000 | PITG_05036 | Family4797  |
|                 | Block DOES NOT EXIST | PITG_09329 | Family18075 | PITG_09330 | Family384   |
|                 | Block EXISTS         | PITG_10583 | Family4797  | PITG_10584 | Family384   |
|                 | Block EXISTS         | PITG_14338 | Family11000 | PITG_14339 | Family4797  |
| BlockID: Pin_72 | Present              |            |             |            |             |
|                 | Block EXISTS         | PITG_14339 | Family4797  | PITG_14343 | Family501   |
|                 | Block EXISTS         | PITG_20641 | Family501   | PITG_20644 | Family4797  |
| BlockID: Pin_73 | Present              |            |             |            |             |
|                 | Block EXISTS         | PITG_09524 | Family2648  | PITG_09525 | Family4366  |
|                 | Block EXISTS         | PITG_09627 | Family4366  | PITG_09628 | Family2648  |
| BlockID: Pin_74 | Present              |            |             |            |             |
|                 | Block EXISTS         | PITG_13947 | Family12423 | PITG_13948 | Family920   |
|                 | Block DOES NOT EXIST | PITG_13949 | Family6906  | PITG_13950 | Family920   |
|                 | Block DOES NOT EXIST | PITG_13951 | Family12423 | PITG_13952 | Family920   |

|                 |                        |            |             |            |             |
|-----------------|------------------------|------------|-------------|------------|-------------|
|                 | Block EXISTS           | PITG_13953 | Family920   | PITG_13954 | Family12423 |
| BlockID: Pin_75 | Present                |            |             |            |             |
|                 | Block EXISTS           | PITG_01889 | Family384   | PITG_01890 | Family805   |
|                 | Block EXISTS           | PITG_05051 | Family384   | PITG_05052 | Family805   |
|                 | Block EXISTS           | PITG_09330 | Family384   | PITG_09331 | Family805   |
|                 | Block EXISTS           | PITG_13217 | Family805   | PITG_13218 | Family384   |
|                 | Block EXISTS           | PITG_18528 | Family805   | PITG_18529 | Family384   |
|                 | Block DOES NOT EXIST   | PITG_18557 | Family11000 | PITG_18558 | Family805   |
| BlockID: Pin_76 | Present                |            |             |            |             |
|                 | Block EXISTS           | PITG_17596 | Family6277  | PITG_17597 | Family4477  |
|                 | Block EXISTS           | PITG_21023 | Family4477  | PITG_21024 | Family6277  |
| BlockID: Pin_77 | Present                |            |             |            |             |
|                 | Block EXISTS           | PITG_04269 | Family4     | PITG_04270 | Family60    |
|                 | Block EXISTS           | PITG_04275 | Family60    | PITG_04276 | Family4     |
| BlockID: Pin_78 | Dissimilar families    |            |             |            |             |
|                 | Block DOES NOT EXIST   | PITG_16701 | Family4     | PITG_16702 | Family13757 |
|                 | Block DOES NOT EXIST   | PITG_16703 | Family28469 | PITG_16705 | Family4     |
|                 | Block DOES NOT EXIST   | PITG_16726 | Family4     | PITG_16727 | Family1597  |
| BlockID: Pin_79 | Present (diff. copies) |            |             |            |             |
|                 | Block EXISTS           | PITG_14673 | Family4     | PITG_14674 | Family78    |
|                 | Block DOES NOT EXIST   | PITG_15120 | Family16539 | PITG_15123 | Family4     |
|                 | Block DOES NOT EXIST   | PITG_15124 | Family78    | PITG_15125 | Family4     |
| BlockID: Pin_8  | Dissimilar families    |            |             |            |             |
|                 | Block DOES NOT EXIST   | PITG_16142 | Family9789  | PITG_16143 | Family16174 |
|                 | Block DOES NOT EXIST   | PITG_17186 | Family16174 | PITG_17187 | Family600   |
| BlockID: Pin_80 | Present                |            |             |            |             |
|                 | Block DOES NOT EXIST   | PITG_13567 | Family69    | PITG_13568 | Family28332 |
|                 | Block EXISTS           | PITG_13569 | Family69    | PITG_13570 | Family18194 |
|                 | Block EXISTS           | PITG_13571 | Family69    | PITG_13572 | Family18194 |
| BlockID: Pin_81 | Present                |            |             |            |             |
|                 | Block EXISTS           | PITG_12498 | Family6743  | PITG_12499 | Family2710  |
|                 | Block EXISTS           | PITG_21210 | Family2710  | PITG_21211 | Family6743  |
| BlockID: Pin_82 | Present                |            |             |            |             |
|                 | Block EXISTS           | PITG_04751 | Family695   | PITG_04752 | Family488   |
|                 | Block EXISTS           | PITG_04758 | Family488   | PITG_04759 | Family695   |
|                 | Block EXISTS           | PITG_04813 | Family488   | PITG_04814 | Family695   |
| BlockID: Pin_83 | Present                |            |             |            |             |
|                 | Block EXISTS           | PITG_04742 | Family695   | PITG_23246 | Family760   |
|                 | Block EXISTS           | PITG_04795 | Family695   | PITG_04796 | Family760   |
|                 | Block DOES NOT EXIST   | PITG_04811 | Family18100 | PITG_23258 | Family18107 |
|                 | Block EXISTS           | PITG_12072 | Family695   | PITG_12073 | Family760   |
| BlockID: Pin_84 | Dissimilar families    |            |             |            |             |
|                 | Block DOES NOT EXIST   | PITG_04739 | Family18100 | PITG_04740 | Family968   |
|                 | Block DOES NOT EXIST   | PITG_04791 | Family968   | PITG_04792 | Family695   |
| BlockID: Pin_85 | Present                |            |             |            |             |
|                 | Block EXISTS           | PITG_14496 | Family1785  | PITG_14497 | Family2701  |
|                 | Block EXISTS           | PITG_19488 | Family2701  | PITG_19489 | Family1785  |
| BlockID: Pin_86 | Present                |            |             |            |             |
|                 | Block DOES NOT EXIST   | PITG_07464 | Family28014 | PITG_07467 | Family506   |
|                 | Block DOES NOT EXIST   | PITG_07486 | Family506   | PITG_07487 | Family14448 |
|                 | Block EXISTS           | PITG_07514 | Family506   | PITG_07516 | Family4725  |
|                 | Block EXISTS           | PITG_20691 | Family506   | PITG_20692 | Family4725  |
| BlockID: Pin_87 | Dissimilar families    |            |             |            |             |
|                 | Block DOES NOT EXIST   | PITG_04410 | Family4399  | PITG_04414 | Family275   |
|                 | Block DOES NOT EXIST   | PITG_19389 | Family275   | PITG_19394 | Family501   |
| BlockID: Pin_88 | Present (diff. copies) |            |             |            |             |
|                 | Block EXISTS           | PITG_05049 | Family264   | PITG_05051 | Family384   |
|                 | Block DOES NOT EXIST   | PITG_18554 | Family501   | PITG_18557 | Family11000 |
| BlockID: Pin_89 | Present                |            |             |            |             |
|                 | Block EXISTS           | PITG_11279 | Family145   | PITG_11282 | Family12    |



|                  |                        |            |             |            |             |
|------------------|------------------------|------------|-------------|------------|-------------|
|                  | Block EXISTS           | PITG_17806 | Family12    | PITG_17807 | Family145   |
| BlockID: Pin_9   | Present                |            |             |            |             |
|                  | Block EXISTS           | PITG_15174 | Family11871 | PITG_15175 | Family529   |
|                  | Block EXISTS           | PITG_20148 | Family529   | PITG_20149 | Family11871 |
| BlockID: Pin_90  | Dissimilar families    |            |             |            |             |
|                  | Block DOES NOT EXIST   | PITG_19426 | Family12    | PITG_19428 | Family11449 |
|                  | Block DOES NOT EXIST   | PITG_19429 | Family11450 | PITG_19432 | Family12    |
| BlockID: Pin_91  | Present                |            |             |            |             |
|                  | Block EXISTS           | PITG_02614 | Family10579 | PITG_02615 | Family2671  |
|                  | Block EXISTS           | PITG_21765 | Family2671  | PITG_21766 | Family10579 |
| BlockID: Pin_92  | Dissimilar families    |            |             |            |             |
|                  | Block DOES NOT EXIST   | PITG_00607 | Family18063 | PITG_00608 | Family12396 |
|                  | Block DOES NOT EXIST   | PITG_14567 | Family18202 | PITG_14568 | Family12396 |
|                  | Block DOES NOT EXIST   | PITG_16935 | Family18110 | PITG_16936 | Family18202 |
| BlockID: Pin_93  | Present                |            |             |            |             |
|                  | Block EXISTS           | PITG_17595 | Family4476  | PITG_17596 | Family6277  |
|                  | Block EXISTS           | PITG_21024 | Family6277  | PITG_21025 | Family4476  |
| BlockID: Pin_94  | Present                |            |             |            |             |
|                  | Block EXISTS           | PITG_02164 | Family6224  | PITG_22693 | Family583   |
|                  | Block EXISTS           | PITG_20294 | Family6224  | PITG_23184 | Family583   |
| BlockID: Pin_95  | Present                |            |             |            |             |
|                  | Block EXISTS           | PITG_01379 | Family7082  | PITG_01380 | Family11772 |
|                  | Block EXISTS           | PITG_18034 | Family7082  | PITG_18035 | Family11772 |
| BlockID: Pin_96  | Dissimilar families    |            |             |            |             |
|                  | Block DOES NOT EXIST   | PITG_17349 | Family4070  | PITG_17350 | Family7728  |
|                  | Block DOES NOT EXIST   | PITG_20727 | Family6155  | PITG_20728 | Family4070  |
| BlockID: Pin_97  | Present                |            |             |            |             |
|                  | Block EXISTS           | PITG_10328 | Family3972  | PITG_10329 | Family2772  |
|                  | Block EXISTS           | PITG_19240 | Family2772  | PITG_19242 | Family3972  |
| BlockID: Pin_98  | Present                |            |             |            |             |
|                  | Block EXISTS           | PITG_11349 | Family14464 | PITG_11350 | Family9503  |
|                  | Block EXISTS           | PITG_11382 | Family14464 | PITG_22935 | Family9503  |
|                  | Block EXISTS           | PITG_11384 | Family9503  | PITG_11385 | Family14464 |
| BlockID: Pin_99  | Present                |            |             |            |             |
|                  | Block EXISTS           | PITG_17593 | Family1940  | PITG_17594 | Family1338  |
|                  | Block EXISTS           | PITG_21026 | Family1338  | PITG_21027 | Family1940  |
| BlockID: Pra_1   | Present                |            |             |            |             |
|                  | Block EXISTS           | Pr_74268   | Family2     | Pr_74269   | Family8     |
|                  | Block EXISTS           | Pr_74272   | Family8     | Pr_74273   | Family2     |
| BlockID: Pra_10  | Present (diff. copies) |            |             |            |             |
|                  | Block DOES NOT EXIST   | Pr_81082   | Family556   | Pr_81083   | Family30890 |
|                  | Block EXISTS           | Pr_83371   | Family556   | Pr_83372   | Family13498 |
| BlockID: Pra_100 | Dissimilar families    |            |             |            |             |
|                  | Block DOES NOT EXIST   | Pr_42921   | Family6467  | Pr_85362   | Family4715  |
|                  | Block DOES NOT EXIST   | Pr_96498   | Family31096 | Pr_96499   | Family6467  |
| BlockID: Pra_101 | Present                |            |             |            |             |
|                  | Block EXISTS           | Pr_79515   | Family239   | Pr_79516   | Family379   |
|                  | Block EXISTS           | Pr_79518   | Family379   | Pr_79519   | Family239   |
| BlockID: Pra_102 | Dissimilar families    |            |             |            |             |
|                  | Block DOES NOT EXIST   | Pr_72932   | Family3307  | Pr_93398   | Family3233  |
|                  | Block DOES NOT EXIST   | Pr_84158   | Family3307  | Pr_84159   | Family30944 |
| BlockID: Pra_103 | Present                |            |             |            |             |
|                  | Block EXISTS           | Pr_73785   | Family1859  | Pr_93705   | Family449   |
|                  | Block EXISTS           | Pr_73788   | Family449   | Pr_93708   | Family1859  |
| BlockID: Pra_104 | Present                |            |             |            |             |
|                  | Block EXISTS           | Pr_72245   | Family107   | Pr_84520   | Family39    |
|                  | Block EXISTS           | Pr_72247   | Family107   | Pr_84527   | Family39    |
| BlockID: Pra_105 | Gene missing           |            |             |            |             |
|                  | Block DOES NOT EXIST   | Pr_75596   | No families | Pr_75597   | Family249   |
|                  | Block DOES NOT EXIST   | Pr_75598   | No families | Pr_75599   | No families |

|                  |                      |          |             |          |             |
|------------------|----------------------|----------|-------------|----------|-------------|
|                  | Block DOES NOT EXIST | Pr_82632 | No families | Pr_82633 | No families |
|                  | Block DOES NOT EXIST | Pr_83204 | No families | Pr_83205 | Family249   |
|                  | Block DOES NOT EXIST | Pr_84891 | No families | Pr_84892 | No families |
| BlockID: Pra_106 | Gene missing         |          |             |          |             |
|                  | Block DOES NOT EXIST | Pr_79746 | Family539   | Pr_79748 | Family686   |
|                  | Block DOES NOT EXIST | Pr_79750 | No families | Pr_79751 | Family539   |
| BlockID: Pra_107 | Dissimilar families  |          |             |          |             |
|                  | Block DOES NOT EXIST | Pr_77326 | Family1190  | Pr_77327 | Family1920  |
|                  | Block DOES NOT EXIST | Pr_77329 | Family1920  | Pr_77330 | Family30820 |
| BlockID: Pra_108 | Present              |          |             |          |             |
|                  | Block EXISTS         | Pr_39775 | Family52    | Pr_75236 | Family250   |
|                  | Block EXISTS         | Pr_75227 | Family52    | Pr_75228 | Family250   |
|                  | Block EXISTS         | Pr_75230 | Family250   | Pr_75231 | Family52    |
|                  | Block EXISTS         | Pr_75232 | Family250   | Pr_75233 | Family52    |
| BlockID: Pra_109 | Present              |          |             |          |             |
|                  | Block EXISTS         | Pr_40336 | Family445   | Pr_84626 | Family2012  |
|                  | Block EXISTS         | Pr_84627 | Family2012  | Pr_84628 | Family445   |
| BlockID: Pra_11  | Present              |          |             |          |             |
|                  | Block EXISTS         | Pr_44405 | Family7     | Pr_76956 | Family288   |
|                  | Block EXISTS         | Pr_71588 | Family7     | Pr_78154 | Family288   |
|                  | Block DOES NOT EXIST | Pr_71618 | Family7     | Pr_78438 | Family14493 |
| BlockID: Pra_110 | Present              |          |             |          |             |
|                  | Block EXISTS         | Pr_74225 | Family4672  | Pr_74226 | Family8     |
|                  | Block EXISTS         | Pr_74227 | Family8     | Pr_74228 | Family4672  |
| BlockID: Pra_111 | Present              |          |             |          |             |
|                  | Block EXISTS         | Pr_71551 | Family44    | Pr_77785 | Family643   |
|                  | Block DOES NOT EXIST | Pr_71553 | Family44    | Pr_94924 | Family18701 |
|                  | Block EXISTS         | Pr_77767 | Family643   | Pr_77768 | Family44    |
| BlockID: Pra_112 | Present              |          |             |          |             |
|                  | Block EXISTS         | Pr_83916 | Family103   | Pr_83917 | Family10031 |
|                  | Block EXISTS         | Pr_83918 | Family10031 | Pr_83919 | Family103   |
|                  | Block DOES NOT EXIST | Pr_85960 | Family69    | Pr_85961 | Family103   |
| BlockID: Pra_113 | Dissimilar families  |          |             |          |             |
|                  | Block DOES NOT EXIST | Pr_75752 | Family2851  | Pr_75753 | Family3879  |
|                  | Block DOES NOT EXIST | Pr_77851 | Family2851  | Pr_77852 | Family30828 |
| BlockID: Pra_114 | Dissimilar families  |          |             |          |             |
|                  | Block DOES NOT EXIST | Pr_84393 | Family7520  | Pr_84394 | Family30952 |
|                  | Block DOES NOT EXIST | Pr_84395 | Family7958  | Pr_96842 | Family9235  |
| BlockID: Pra_115 | Present              |          |             |          |             |
|                  | Block EXISTS         | Pr_73682 | Family491   | Pr_73683 | Family113   |
|                  | Block EXISTS         | Pr_78701 | Family491   | Pr_78702 | Family113   |
|                  | Block EXISTS         | Pr_78703 | Family113   | Pr_78704 | Family491   |
| BlockID: Pra_116 | One family           |          |             |          |             |
|                  | Block DOES NOT EXIST | Pr_74123 | Family254   | Pr_74124 | Family254   |
|                  | Block DOES NOT EXIST | Pr_74129 | Family254   | Pr_74130 | Family254   |
| BlockID: Pra_117 | Present              |          |             |          |             |
|                  | Block EXISTS         | Pr_41853 | Family4680  | Pr_85113 | Family14644 |
|                  | Block EXISTS         | Pr_42981 | Family4680  | Pr_85389 | Family14644 |
| BlockID: Pra_118 | Dissimilar families  |          |             |          |             |
|                  | Block DOES NOT EXIST | Pr_73844 | Family854   | Pr_73845 | Family4393  |
|                  | Block DOES NOT EXIST | Pr_73852 | Family7761  | Pr_73853 | Family854   |
|                  | Block DOES NOT EXIST | Pr_73854 | Family854   | Pr_73855 | Family30748 |
| BlockID: Pra_119 | Present              |          |             |          |             |
|                  | Block EXISTS         | Pr_49345 | Family1816  | Pr_80150 | Family13311 |
|                  | Block EXISTS         | Pr_71772 | Family1816  | Pr_80127 | Family13311 |
| BlockID: Pra_12  | Dissimilar families  |          |             |          |             |
|                  | Block DOES NOT EXIST | Pr_54469 | Family10044 | Pr_83556 | Family14629 |
|                  | Block DOES NOT EXIST | Pr_79581 | Family7628  | Pr_79582 | Family11289 |
|                  | Block DOES NOT EXIST | Pr_79589 | Family14629 | Pr_79590 | Family30855 |
| BlockID: Pra_120 | Gene missing         |          |             |          |             |

|                  |                      |          |             |          |             |
|------------------|----------------------|----------|-------------|----------|-------------|
|                  | Block DOES NOT EXIST | Pr_75601 | Family10348 | Pr_75602 | No families |
|                  | Block DOES NOT EXIST | Pr_78353 | No families | Pr_78354 | No families |
| BlockID: Pra_121 | Gene missing         |          |             |          |             |
|                  | Block DOES NOT EXIST | Pr_79146 | No families | Pr_79147 | Family6880  |
|                  | Block DOES NOT EXIST | Pr_83337 | Family639   | Pr_83338 | No families |
| BlockID: Pra_122 | Present              |          |             |          |             |
|                  | Block EXISTS         | Pr_80494 | Family18560 | Pr_80495 | Family18312 |
|                  | Block EXISTS         | Pr_80496 | Family18312 | Pr_80497 | Family18560 |
| BlockID: Pra_123 | Dissimilar families  |          |             |          |             |
|                  | Block DOES NOT EXIST | Pr_46120 | Family2926  | Pr_77925 | Family740   |
|                  | Block DOES NOT EXIST | Pr_71567 | Family740   | Pr_77922 | Family14    |
| BlockID: Pra_124 | Dissimilar families  |          |             |          |             |
|                  | Block DOES NOT EXIST | Pr_72078 | Family34    | Pr_83093 | Family185   |
|                  | Block DOES NOT EXIST | Pr_83095 | Family4404  | Pr_83096 | Family185   |
| BlockID: Pra_125 | Present              |          |             |          |             |
|                  | Block EXISTS         | Pr_49472 | Family1412  | Pr_80183 | Family139   |
|                  | Block EXISTS         | Pr_49493 | Family1412  | Pr_80205 | Family139   |
| BlockID: Pra_126 | Present              |          |             |          |             |
|                  | Block EXISTS         | Pr_41857 | Family67    | Pr_85116 | Family1889  |
|                  | Block EXISTS         | Pr_41862 | Family67    | Pr_85118 | Family1889  |
| BlockID: Pra_127 | Present              |          |             |          |             |
|                  | Block EXISTS         | Pr_73621 | Family21    | Pr_73622 | Family95    |
|                  | Block EXISTS         | Pr_73623 | Family95    | Pr_73624 | Family21    |
| BlockID: Pra_128 | Dissimilar families  |          |             |          |             |
|                  | Block DOES NOT EXIST | Pr_45408 | Family12849 | Pr_77346 | Family2445  |
|                  | Block DOES NOT EXIST | Pr_74920 | Family5976  | Pr_74921 | Family138   |
| BlockID: Pra_13  | Dissimilar families  |          |             |          |             |
|                  | Block DOES NOT EXIST | Pr_73607 | Family137   | Pr_73608 | Family142   |
|                  | Block DOES NOT EXIST | Pr_83498 | Family142   | Pr_83499 | Family246   |
| BlockID: Pra_14  | Present              |          |             |          |             |
|                  | Block EXISTS         | Pr_73241 | Family718   | Pr_73242 | Family14613 |
|                  | Block EXISTS         | Pr_85222 | Family14613 | Pr_85223 | Family718   |
| BlockID: Pra_15  | Present              |          |             |          |             |
|                  | Block DOES NOT EXIST | Pr_72947 | No families | Pr_72949 | Family64    |
|                  | Block EXISTS         | Pr_77080 | Family64    | Pr_77081 | Family967   |
|                  | Block EXISTS         | Pr_79457 | Family656   | Pr_79458 | Family64    |
|                  | Block EXISTS         | Pr_81559 | Family635   | Pr_81560 | Family656   |
|                  | Block EXISTS         | Pr_81759 | Family64    | Pr_81760 | Family967   |
|                  | Block EXISTS         | Pr_83103 | Family490   | Pr_83104 | Family635   |
| BlockID: Pra_16  | Dissimilar families  |          |             |          |             |
|                  | Block DOES NOT EXIST | Pr_78558 | Family112   | Pr_78559 | Family14623 |
|                  | Block DOES NOT EXIST | Pr_78560 | Family14623 | Pr_78561 | Family1227  |
| BlockID: Pra_17  | Dissimilar families  |          |             |          |             |
|                  | Block DOES NOT EXIST | Pr_84561 | Family845   | Pr_96881 | Family8151  |
|                  | Block DOES NOT EXIST | Pr_84747 | Family845   | Pr_84748 | Family8287  |
| BlockID: Pra_18  | Present              |          |             |          |             |
|                  | Block EXISTS         | Pr_73292 | Family845   | Pr_73293 | Family556   |
|                  | Block DOES NOT EXIST | Pr_79475 | Family556   | Pr_79476 | Family30853 |
|                  | Block EXISTS         | Pr_83546 | Family6909  | Pr_83547 | Family845   |
|                  | Block EXISTS         | Pr_84574 | Family18688 | Pr_84575 | Family18689 |
|                  | Block EXISTS         | Pr_84746 | Family6909  | Pr_84747 | Family845   |
|                  | Block EXISTS         | Pr_85564 | Family18689 | Pr_85565 | Family18688 |
| BlockID: Pra_19  | Gene missing         |          |             |          |             |
|                  | Block DOES NOT EXIST | Pr_47622 | No families | Pr_78752 | Family1487  |
|                  | Block DOES NOT EXIST | Pr_47624 | No families | Pr_78757 | Family22    |
| BlockID: Pra_2   | Present              |          |             |          |             |
|                  | Block EXISTS         | Pr_76970 | Family1136  | Pr_76971 | Family1404  |
|                  | Block EXISTS         | Pr_81658 | Family1136  | Pr_81659 | Family1404  |
| BlockID: Pra_20  | Dissimilar families  |          |             |          |             |
|                  | Block DOES NOT EXIST | Pr_85349 | Family30968 | Pr_85350 | Family30969 |

|                 |                     |                      |          |             |          |             |
|-----------------|---------------------|----------------------|----------|-------------|----------|-------------|
|                 |                     | Block DOES NOT EXIST | Pr_96555 | Family11029 | Pr_96556 | Family31097 |
| BlockID: Pra_21 | Dissimilar families |                      |          |             |          |             |
|                 |                     | Block DOES NOT EXIST | Pr_76236 | Family7031  | Pr_76237 | Family164   |
|                 |                     | Block DOES NOT EXIST | Pr_78328 | Family164   | Pr_78329 | Family2456  |
| BlockID: Pra_22 | Present             |                      |          |             |          |             |
|                 |                     | Block EXISTS         | Pr_77656 | Family8807  | Pr_77657 | Family3610  |
|                 |                     | Block EXISTS         | Pr_85331 | Family3610  | Pr_97104 | Family8807  |
| BlockID: Pra_23 | Present             |                      |          |             |          |             |
|                 |                     | Block EXISTS         | Pr_42921 | Family6467  | Pr_85361 | Family5513  |
|                 |                     | Block EXISTS         | Pr_96499 | Family6467  | Pr_96500 | Family5513  |
| BlockID: Pra_24 | Present             |                      |          |             |          |             |
|                 |                     | Block EXISTS         | Pr_72932 | Family3307  | Pr_72933 | Family3458  |
|                 |                     | Block EXISTS         | Pr_84157 | Family3458  | Pr_84158 | Family3307  |
| BlockID: Pra_25 | Gene missing        |                      |          |             |          |             |
|                 |                     | Block DOES NOT EXIST | Pr_52940 | No families | Pr_82640 | Family17463 |
|                 |                     | Block DOES NOT EXIST | Pr_71502 | No families | Pr_77264 | No families |
| BlockID: Pra_26 | Present             |                      |          |             |          |             |
|                 |                     | Block EXISTS         | Pr_74345 | Family8482  | Pr_74346 | Family1694  |
|                 |                     | Block EXISTS         | Pr_84058 | Family1694  | Pr_84059 | Family8482  |
| BlockID: Pra_27 | Present             |                      |          |             |          |             |
|                 |                     | Block EXISTS         | Pr_76331 | Family6     | Pr_76332 | Family15    |
|                 |                     | Block EXISTS         | Pr_83098 | Family15    | Pr_83099 | Family6     |
| BlockID: Pra_28 | Present             |                      |          |             |          |             |
|                 |                     | Block EXISTS         | Pr_53735 | Family261   | Pr_83158 | Family1683  |
|                 |                     | Block EXISTS         | Pr_83159 | Family1683  | Pr_83160 | Family261   |
| BlockID: Pra_29 | Gene missing        |                      |          |             |          |             |
|                 |                     | Block DOES NOT EXIST | Pr_48644 | No families | Pr_79511 | Family146   |
|                 |                     | Block DOES NOT EXIST | Pr_71709 | Family107   | Pr_79513 | Family146   |
| BlockID: Pra_3  | Dissimilar families |                      |          |             |          |             |
|                 |                     | Block EXISTS         | Pr_44199 | Family23    | Pr_76724 | Family399   |
|                 |                     | Block DOES NOT EXIST | Pr_71443 | Family23    | Pr_76717 | Family15571 |
| BlockID: Pra_30 | Dissimilar families |                      |          |             |          |             |
|                 |                     | Block DOES NOT EXIST | Pr_81532 | Family1934  | Pr_81533 | Family1018  |
|                 |                     | Block DOES NOT EXIST | Pr_81534 | Family4456  | Pr_81535 | Family1018  |
| BlockID: Pra_31 | Present             |                      |          |             |          |             |
|                 |                     | Block EXISTS         | Pr_83461 | Family1999  | Pr_83462 | Family165   |
|                 |                     | Block EXISTS         | Pr_85046 | Family165   | Pr_85047 | Family1999  |
| BlockID: Pra_32 | Present             |                      |          |             |          |             |
|                 |                     | Block EXISTS         | Pr_82360 | Family18257 | Pr_82361 | Family1695  |
|                 |                     | Block EXISTS         | Pr_84270 | Family18257 | Pr_96818 | Family1695  |
| BlockID: Pra_33 | Dissimilar families |                      |          |             |          |             |
|                 |                     | Block DOES NOT EXIST | Pr_79459 | No families | Pr_79461 | Family10916 |
|                 |                     | Block DOES NOT EXIST | Pr_80168 | No families | Pr_80169 | Family8376  |
|                 |                     | Block DOES NOT EXIST | Pr_80537 | No families | Pr_80539 | Family10916 |
|                 |                     | Block DOES NOT EXIST | Pr_81001 | Family759   | Pr_81003 | No families |
|                 |                     | Block DOES NOT EXIST | Pr_82175 | Family759   | Pr_82176 | Family11219 |
|                 |                     | Block DOES NOT EXIST | Pr_82503 | No families | Pr_82504 | Family25584 |
|                 |                     | Block DOES NOT EXIST | Pr_83504 | Family10916 | Pr_83505 | No families |
| BlockID: Pra_34 | Gene missing        |                      |          |             |          |             |
|                 |                     | Block DOES NOT EXIST | Pr_43521 | No families | Pr_76662 | No families |
|                 |                     | Block DOES NOT EXIST | Pr_49465 | No families | Pr_80286 | No families |
| BlockID: Pra_35 | Dissimilar families |                      |          |             |          |             |
|                 |                     | Block DOES NOT EXIST | Pr_49228 | No families | Pr_80059 | Family11846 |
|                 |                     | Block DOES NOT EXIST | Pr_52940 | No families | Pr_82638 | Family759   |
|                 |                     | Block DOES NOT EXIST | Pr_72171 | No families | Pr_83941 | Family8376  |
| BlockID: Pra_36 | Present             |                      |          |             |          |             |
|                 |                     | Block EXISTS         | Pr_71839 | Family15    | Pr_80873 | Family200   |
|                 |                     | Block EXISTS         | Pr_79471 | Family200   | Pr_79472 | Family15    |
| BlockID: Pra_37 | Present             |                      |          |             |          |             |
|                 |                     | Block EXISTS         | Pr_77655 | Family1325  | Pr_77656 | Family8807  |

|                 |                        |                      |          |             |          |             |
|-----------------|------------------------|----------------------|----------|-------------|----------|-------------|
|                 |                        | Block EXISTS         | Pr_85333 | Family1325  | Pr_97104 | Family8807  |
| BlockID: Pra_38 | Present                |                      |          |             |          |             |
|                 |                        | Block EXISTS         | Pr_72684 | Family28    | Pr_72685 | Family2161  |
|                 |                        | Block EXISTS         | Pr_72687 | Family2161  | Pr_72688 | Family28    |
| BlockID: Pra_39 | Present                |                      |          |             |          |             |
|                 |                        | Block EXISTS         | Pr_83576 | Family25    | Pr_83577 | Family155   |
|                 |                        | Block EXISTS         | Pr_83578 | Family25    | Pr_83579 | Family155   |
| BlockID: Pra_4  | Dissimilar families    |                      |          |             |          |             |
|                 |                        | Block DOES NOT EXIST | Pr_83802 | Family15515 | Pr_83803 | Family3202  |
|                 |                        | Block DOES NOT EXIST | Pr_84987 | Family3202  | Pr_84988 | Family3917  |
| BlockID: Pra_40 | Present                |                      |          |             |          |             |
|                 |                        | Block EXISTS         | Pr_75664 | Family1024  | Pr_75665 | Family54    |
|                 |                        | Block EXISTS         | Pr_94231 | Family54    | Pr_94233 | Family1024  |
| BlockID: Pra_41 | Present                |                      |          |             |          |             |
|                 |                        | Block EXISTS         | Pr_72365 | Family6865  | Pr_85724 | Family6536  |
|                 |                        | Block EXISTS         | Pr_85721 | Family6865  | Pr_85722 | Family6536  |
| BlockID: Pra_42 | Dissimilar families    |                      |          |             |          |             |
|                 |                        | Block DOES NOT EXIST | Pr_71285 | Family62    | Pr_75161 | Family122   |
|                 |                        | Block DOES NOT EXIST | Pr_79547 | Family62    | Pr_79548 | Family80    |
| BlockID: Pra_43 | Present                |                      |          |             |          |             |
|                 |                        | Block EXISTS         | Pr_40437 | Family2518  | Pr_75414 | Family9     |
|                 |                        | Block EXISTS         | Pr_71306 | Family2518  | Pr_75411 | Family9     |
| BlockID: Pra_44 | Dissimilar families    |                      |          |             |          |             |
|                 |                        | Block DOES NOT EXIST | Pr_73349 | Family9     | Pr_73350 | Family127   |
|                 |                        | Block DOES NOT EXIST | Pr_73351 | Family174   | Pr_73352 | Family6792  |
| BlockID: Pra_45 | Present (diff. copies) |                      |          |             |          |             |
|                 |                        | Block DOES NOT EXIST | Pr_82873 | Family719   | Pr_82874 | Family3432  |
|                 |                        | Block EXISTS         | Pr_82876 | Family6015  | Pr_82877 | Family1906  |
| BlockID: Pra_46 | Present                |                      |          |             |          |             |
|                 |                        | Block EXISTS         | Pr_85097 | Family2242  | Pr_85098 | Family782   |
|                 |                        | Block EXISTS         | Pr_85099 | Family782   | Pr_85100 | Family2242  |
| BlockID: Pra_47 | Present                |                      |          |             |          |             |
|                 |                        | Block EXISTS         | Pr_71069 | Family194   | Pr_71070 | Family203   |
|                 |                        | Block EXISTS         | Pr_71906 | Family194   | Pr_71907 | Family203   |
| BlockID: Pra_48 | Gene missing           |                      |          |             |          |             |
|                 |                        | Block DOES NOT EXIST | Pr_42566 | No families | Pr_85284 | No families |
|                 |                        | Block DOES NOT EXIST | Pr_49751 | No families | Pr_80425 | No families |
| BlockID: Pra_5  | Present                |                      |          |             |          |             |
|                 |                        | Block EXISTS         | Pr_78169 | Family187   | Pr_78170 | Family340   |
|                 |                        | Block DOES NOT EXIST | Pr_78171 | Family340   | Pr_78172 | Family1520  |
|                 |                        | Block EXISTS         | Pr_78173 | Family340   | Pr_78174 | Family187   |
| BlockID: Pra_50 | Dissimilar families    |                      |          |             |          |             |
|                 |                        | Block DOES NOT EXIST | Pr_41853 | Family4680  | Pr_85111 | Family30961 |
|                 |                        | Block DOES NOT EXIST | Pr_42981 | Family4680  | Pr_85391 | Family4033  |
| BlockID: Pra_51 | Dissimilar families    |                      |          |             |          |             |
|                 |                        | Block DOES NOT EXIST | Pr_73259 | Family1551  | Pr_73260 | Family297   |
|                 |                        | Block DOES NOT EXIST | Pr_73263 | Family297   | Pr_73264 | Family16124 |
| BlockID: Pra_52 | Dissimilar families    |                      |          |             |          |             |
|                 |                        | Block DOES NOT EXIST | Pr_76304 | Family26    | Pr_76305 | Family6     |
|                 |                        | Block DOES NOT EXIST | Pr_76311 | Family8562  | Pr_76312 | Family26    |
| BlockID: Pra_53 | Dissimilar families    |                      |          |             |          |             |
|                 |                        | Block DOES NOT EXIST | Pr_73242 | Family14613 | Pr_73243 | Family30743 |
|                 |                        | Block DOES NOT EXIST | Pr_85221 | Family5651  | Pr_85222 | Family14613 |
| BlockID: Pra_54 | Present                |                      |          |             |          |             |
|                 |                        | Block EXISTS         | Pr_40367 | Family100   | Pr_84650 | Family191   |
|                 |                        | Block EXISTS         | Pr_85109 | Family100   | Pr_85110 | Family191   |
| BlockID: Pra_55 | Present (diff. copies) |                      |          |             |          |             |
|                 |                        | Block DOES NOT EXIST | Pr_71753 | Family39    | Pr_79959 | Family74    |
|                 |                        | Block EXISTS         | Pr_79970 | Family74    | Pr_79971 | Family1904  |
| BlockID: Pra_56 | Present                |                      |          |             |          |             |

|                 |                        |          |             |          |             |
|-----------------|------------------------|----------|-------------|----------|-------------|
|                 | Block EXISTS           | Pr_72124 | Family6865  | Pr_83514 | Family569   |
|                 | Block EXISTS           | Pr_72365 | Family6865  | Pr_85726 | Family569   |
| BlockID: Pra_57 | Dissimilar families    |          |             |          |             |
|                 | Block DOES NOT EXIST   | Pr_84537 | Family1097  | Pr_84538 | Family1496  |
|                 | Block DOES NOT EXIST   | Pr_84541 | Family1496  | Pr_84542 | Family1754  |
| BlockID: Pra_58 | Dissimilar families    |          |             |          |             |
|                 | Block DOES NOT EXIST   | Pr_80924 | Family1207  | Pr_80925 | Family1755  |
|                 | Block DOES NOT EXIST   | Pr_95260 | Family1896  | Pr_95261 | Family713   |
| BlockID: Pra_59 | Present (diff. copies) |          |             |          |             |
|                 | Block DOES NOT EXIST   | Pr_72886 | Family365   | Pr_72887 | Family14611 |
|                 | Block DOES NOT EXIST   | Pr_77154 | Family365   | Pr_77155 | Family1677  |
|                 | Block EXISTS           | Pr_83853 | Family322   | Pr_83854 | Family365   |
| BlockID: Pra_6  | Present                |          |             |          |             |
|                 | Block EXISTS           | Pr_79588 | Family10870 | Pr_79589 | Family14629 |
|                 | Block EXISTS           | Pr_83556 | Family14629 | Pr_83557 | Family10870 |
| BlockID: Pra_60 | Present                |          |             |          |             |
|                 | Block EXISTS           | Pr_85084 | Family313   | Pr_85085 | Family475   |
|                 | Block EXISTS           | Pr_85615 | Family313   | Pr_97140 | Family475   |
| BlockID: Pra_61 | Present                |          |             |          |             |
|                 | Block EXISTS           | Pr_84068 | Family10727 | Pr_84069 | Family12467 |
|                 | Block EXISTS           | Pr_84754 | Family12467 | Pr_84755 | Family10727 |
| BlockID: Pra_62 | Dissimilar families    |          |             |          |             |
|                 | Block DOES NOT EXIST   | Pr_72108 | Family1256  | Pr_83360 | Family4443  |
|                 | Block DOES NOT EXIST   | Pr_72111 | Family1256  | Pr_83369 | Family9053  |
| BlockID: Pra_63 | Present                |          |             |          |             |
|                 | Block EXISTS           | Pr_82678 | Family181   | Pr_82679 | Family1075  |
|                 | Block EXISTS           | Pr_82680 | Family1075  | Pr_82681 | Family181   |
| BlockID: Pra_64 | Present                |          |             |          |             |
|                 | Block EXISTS           | Pr_80529 | Family560   | Pr_80530 | Family1691  |
|                 | Block EXISTS           | Pr_80533 | Family1691  | Pr_80534 | Family560   |
| BlockID: Pra_65 | Gene missing           |          |             |          |             |
|                 | Block DOES NOT EXIST   | Pr_80907 | Family640   | Pr_80908 | No families |
|                 | Block DOES NOT EXIST   | Pr_80910 | No families | Pr_80911 | Family640   |
| BlockID: Pra_66 | Present                |          |             |          |             |
|                 | Block EXISTS           | Pr_41857 | Family67    | Pr_85114 | Family1675  |
|                 | Block EXISTS           | Pr_41862 | Family67    | Pr_85120 | Family1675  |
| BlockID: Pra_67 | Dissimilar families    |          |             |          |             |
|                 | Block DOES NOT EXIST   | Pr_75730 | Family907   | Pr_75731 | Family554   |
|                 | Block DOES NOT EXIST   | Pr_80287 | Family11038 | Pr_80288 | No families |
|                 | Block DOES NOT EXIST   | Pr_81922 | No families | Pr_81923 | Family554   |
| BlockID: Pra_68 | Dissimilar families    |          |             |          |             |
|                 | Block DOES NOT EXIST   | Pr_81600 | Family81    | Pr_81601 | Family18596 |
|                 | Block DOES NOT EXIST   | Pr_81613 | Family30    | Pr_96070 | Family30    |
| BlockID: Pra_69 | Present                |          |             |          |             |
|                 | Block EXISTS           | Pr_82130 | Family429   | Pr_96244 | Family77    |
|                 | Block EXISTS           | Pr_82132 | Family429   | Pr_82133 | Family77    |
| BlockID: Pra_7  | Present                |          |             |          |             |
|                 | Block EXISTS           | Pr_74930 | Family556   | Pr_74931 | Family2008  |
|                 | Block EXISTS           | Pr_74960 | Family2008  | Pr_74961 | Family556   |
|                 | Block DOES NOT EXIST   | Pr_74962 | Family2008  | Pr_74963 | Family30773 |
| BlockID: Pra_70 | Present                |          |             |          |             |
|                 | Block EXISTS           | Pr_48733 | Family2197  | Pr_79706 | Family6909  |
|                 | Block DOES NOT EXIST   | Pr_80115 | Family18647 | Pr_80116 | Family556   |
|                 | Block EXISTS           | Pr_80117 | Family6909  | Pr_80118 | Family2197  |
| BlockID: Pra_71 | Gene missing           |          |             |          |             |
|                 | Block DOES NOT EXIST   | Pr_74297 | Family686   | Pr_74299 | Family4     |
|                 | Block DOES NOT EXIST   | Pr_78057 | Family4     | Pr_78058 | No families |
| BlockID: Pra_72 | Present (diff. copies) |          |             |          |             |
|                 | Block DOES NOT EXIST   | Pr_74231 | Family4     | Pr_74232 | No families |
|                 | Block DOES NOT EXIST   | Pr_78070 | Family4     | Pr_78071 | Family10348 |

|                 |                        |          |             |          |             |
|-----------------|------------------------|----------|-------------|----------|-------------|
|                 | Block DOES NOT EXIST   | Pr_82362 | Family1964  | Pr_82363 | Family4     |
|                 | Block EXISTS           | Pr_82365 | Family1964  | Pr_82366 | Family4     |
| BlockID: Pra_73 | Present                |          |             |          |             |
|                 | Block EXISTS           | Pr_74233 | Family4     | Pr_74234 | Family963   |
|                 | Block EXISTS           | Pr_83989 | Family963   | Pr_83990 | Family4     |
| BlockID: Pra_74 | Present                |          |             |          |             |
|                 | Block EXISTS           | Pr_50148 | Family2787  | Pr_71817 | Family1355  |
|                 | Block EXISTS           | Pr_71696 | Family1355  | Pr_95374 | Family2787  |
| BlockID: Pra_75 | Present                |          |             |          |             |
|                 | Block EXISTS           | Pr_42003 | Family66    | Pr_75973 | Family129   |
|                 | Block EXISTS           | Pr_71377 | Family66    | Pr_75965 | Family129   |
|                 | Block EXISTS           | Pr_75967 | Family129   | Pr_75968 | Family66    |
|                 | Block EXISTS           | Pr_75969 | Family129   | Pr_75970 | Family66    |
| BlockID: Pra_76 | Gene missing           |          |             |          |             |
|                 | Block DOES NOT EXIST   | Pr_76273 | Family16153 | Pr_76274 | No families |
|                 | Block DOES NOT EXIST   | Pr_83937 | No families | Pr_83938 | No families |
| BlockID: Pra_77 | Present                |          |             |          |             |
|                 | Block EXISTS           | Pr_72933 | Family3458  | Pr_72934 | Family3457  |
|                 | Block EXISTS           | Pr_84156 | Family3457  | Pr_84157 | Family3458  |
| BlockID: Pra_78 | Dissimilar families    |          |             |          |             |
|                 | Block DOES NOT EXIST   | Pr_83225 | Family12266 | Pr_96555 | Family11029 |
|                 | Block DOES NOT EXIST   | Pr_85350 | Family30969 | Pr_85351 | Family12266 |
| BlockID: Pra_79 | Dissimilar families    |          |             |          |             |
|                 | Block DOES NOT EXIST   | Pr_43055 | Family34    | Pr_76471 | Family15061 |
|                 | Block DOES NOT EXIST   | Pr_76470 | Family15061 | Pr_94491 | Family11    |
| BlockID: Pra_8  | Dissimilar families    |          |             |          |             |
|                 | Block DOES NOT EXIST   | Pr_74979 | Family556   | Pr_74980 | Family10996 |
|                 | Block DOES NOT EXIST   | Pr_84745 | Family10996 | Pr_84746 | Family6909  |
|                 | Block DOES NOT EXIST   | Pr_84913 | Family18599 | Pr_84914 | Family556   |
| BlockID: Pra_80 | Dissimilar families    |          |             |          |             |
|                 | Block DOES NOT EXIST   | Pr_40722 | Family13464 | Pr_84765 | Family352   |
|                 | Block EXISTS           | Pr_85408 | Family11    | Pr_85409 | Family351   |
| BlockID: Pra_81 | Gene missing           |          |             |          |             |
|                 | Block DOES NOT EXIST   | Pr_39486 | Family30702 | Pr_84275 | No families |
|                 | Block DOES NOT EXIST   | Pr_52427 | No families | Pr_74305 | Family638   |
| BlockID: Pra_82 | Dissimilar families    |          |             |          |             |
|                 | Block DOES NOT EXIST   | Pr_72172 | Family58    | Pr_83945 | Family14303 |
|                 | Block DOES NOT EXIST   | Pr_83941 | Family8376  | Pr_83942 | Family58    |
| BlockID: Pra_83 | Present (diff. copies) |          |             |          |             |
|                 | Block DOES NOT EXIST   | Pr_78779 | Family2901  | Pr_78780 | Family806   |
|                 | Block EXISTS           | Pr_78782 | Family806   | Pr_78783 | Family307   |
| BlockID: Pra_84 | Present (diff. copies) |          |             |          |             |
|                 | Block EXISTS           | Pr_83699 | Family1564  | Pr_96650 | Family196   |
|                 | Block DOES NOT EXIST   | Pr_83700 | Family12384 | Pr_83701 | Family196   |
| BlockID: Pra_85 | Dissimilar families    |          |             |          |             |
|                 | Block DOES NOT EXIST   | Pr_77070 | Family562   | Pr_77071 | Family30815 |
|                 | Block DOES NOT EXIST   | Pr_77140 | Family6124  | Pr_77141 | Family562   |
| BlockID: Pra_86 | Dissimilar families    |          |             |          |             |
|                 | Block DOES NOT EXIST   | Pr_44065 | Family157   | Pr_76765 | Family1721  |
|                 | Block EXISTS           | Pr_76761 | Family1721  | Pr_76762 | Family975   |
| BlockID: Pra_87 | Dissimilar families    |          |             |          |             |
|                 | Block DOES NOT EXIST   | Pr_85096 | Family15145 | Pr_85097 | Family2242  |
|                 | Block DOES NOT EXIST   | Pr_85100 | Family2242  | Pr_85101 | Family3186  |
| BlockID: Pra_88 | Present                |          |             |          |             |
|                 | Block EXISTS           | Pr_80732 | Family165   | Pr_80733 | Family18653 |
|                 | Block EXISTS           | Pr_80734 | Family18653 | Pr_80735 | Family165   |
| BlockID: Pra_89 | Present                |          |             |          |             |
|                 | Block EXISTS           | Pr_77845 | Family884   | Pr_77846 | Family9     |
|                 | Block EXISTS           | Pr_77847 | Family9     | Pr_77848 | Family884   |
| BlockID: Pra_9  | Dissimilar families    |          |             |          |             |

|                  |                        |           |             |           |             |
|------------------|------------------------|-----------|-------------|-----------|-------------|
|                  | Block DOES NOT EXIST   | Pr_83387  | Family556   | Pr_83388  | Family30929 |
|                  | Block DOES NOT EXIST   | Pr_84691  | Family556   | Pr_84692  | Family30954 |
| BlockID: Pra_90  | Present                |           |             |           |             |
|                  | Block EXISTS           | Pr_71296  | Family740   | Pr_75271  | Family228   |
|                  | Block EXISTS           | Pr_71567  | Family740   | Pr_77924  | Family228   |
|                  | Block EXISTS           | Pr_72376  | Family740   | Pr_85848  | Family228   |
| BlockID: Pra_91  | Present                |           |             |           |             |
|                  | Block EXISTS           | Pr_85360  | Family4239  | Pr_85361  | Family5513  |
|                  | Block EXISTS           | Pr_96500  | Family5513  | Pr_96502  | Family4239  |
| BlockID: Pra_92  | Present                |           |             |           |             |
|                  | Block EXISTS           | Pr_79190  | Family724   | Pr_79191  | Family725   |
|                  | Block EXISTS           | Pr_83764  | Family725   | Pr_83765  | Family724   |
| BlockID: Pra_93  | Present                |           |             |           |             |
|                  | Block EXISTS           | Pr_85217  | Family570   | Pr_85218  | Family5396  |
|                  | Block EXISTS           | Pr_85338  | Family5396  | Pr_85339  | Family570   |
| BlockID: Pra_94  | Dissimilar families    |           |             |           |             |
|                  | Block DOES NOT EXIST   | Pr_78806  | No families | Pr_78807  | Family2313  |
|                  | Block EXISTS           | Pr_85224  | Family2313  | Pr_85225  | Family3489  |
| BlockID: Pra_95  | Present                |           |             |           |             |
|                  | Block EXISTS           | Pr_79218  | Family481   | Pr_79219  | Family268   |
|                  | Block EXISTS           | Pr_79224  | Family268   | Pr_79225  | Family481   |
| BlockID: Pra_96  | Present                |           |             |           |             |
|                  | Block EXISTS           | Pr_82715  | Family671   | Pr_82716  | Family148   |
|                  | Block EXISTS           | Pr_82719  | Family148   | Pr_82720  | Family671   |
|                  | Block DOES NOT EXIST   | Pr_84119  | Family16686 | Pr_84120  | Family148   |
| BlockID: Pra_97  | Present                |           |             |           |             |
|                  | Block EXISTS           | Pr_75880  | Family1198  | Pr_75881  | Family982   |
|                  | Block EXISTS           | Pr_75884  | Family982   | Pr_75885  | Family1198  |
| BlockID: Pra_98  | Dissimilar families    |           |             |           |             |
|                  | Block DOES NOT EXIST   | Pr_83228  | Family8449  | Pr_96556  | Family31097 |
|                  | Block DOES NOT EXIST   | Pr_85348  | Family102   | Pr_85349  | Family30968 |
| BlockID: Pra_99  | Dissimilar families    |           |             |           |             |
|                  | Block DOES NOT EXIST   | Pr_74366  | Family102   | Pr_74367  | Family4     |
|                  | Block DOES NOT EXIST   | Pr_74368  | Family30764 | Pr_74369  | Family4     |
| BlockID: Pso_1   | Dissimilar families    |           |             |           |             |
|                  | Block DOES NOT EXIST   | Ps_136148 | Family8     | Ps_136149 | Family1793  |
|                  | Block DOES NOT EXIST   | Ps_136162 | Family472   | Ps_136163 | Family8     |
| BlockID: Pso_10  | Present                |           |             |           |             |
|                  | Block EXISTS           | Ps_128078 | Family2860  | Ps_128079 | Family1969  |
|                  | Block DOES NOT EXIST   | Ps_130015 | Family23442 | Ps_130016 | Family432   |
|                  | Block EXISTS           | Ps_130806 | Family2860  | Ps_130807 | Family1969  |
|                  | Block DOES NOT EXIST   | Ps_132082 | Family16005 | Ps_132083 | No families |
|                  | Block EXISTS           | Ps_132112 | Family2860  | Ps_132113 | Family1969  |
|                  | Block DOES NOT EXIST   | Ps_132126 | Family2860  | Ps_132127 | Family6421  |
|                  | Block EXISTS           | Ps_132493 | Family10764 | Ps_132495 | Family432   |
|                  | Block DOES NOT EXIST   | Ps_134071 | Family1969  | Ps_134072 | No families |
|                  | Block EXISTS           | Ps_134389 | Family10764 | Ps_134390 | Family432   |
|                  | Block DOES NOT EXIST   | Ps_134396 | Family31571 | Ps_134397 | Family432   |
|                  | Block DOES NOT EXIST   | Ps_136079 | No families | Ps_136080 | Family1969  |
|                  | Block DOES NOT EXIST   | Ps_137391 | Family432   | Ps_137392 | No families |
|                  | Block DOES NOT EXIST   | Ps_138660 | Family1969  | Ps_138662 | Family18809 |
|                  | Block DOES NOT EXIST   | Ps_139944 | Family28585 | Ps_139946 | Family432   |
|                  | Block DOES NOT EXIST   | Ps_142440 | Family13506 | Ps_142441 | No families |
|                  | Block EXISTS           | Ps_143217 | Family1969  | Ps_143220 | Family18238 |
|                  | Block DOES NOT EXIST   | Ps_143313 | Family14416 | Ps_143315 | Family432   |
| BlockID: Pso_100 | Present                |           |             |           |             |
|                  | Block EXISTS           | Ps_130335 | Family1721  | Ps_130336 | Family975   |
|                  | Block EXISTS           | Ps_130337 | Family975   | Ps_130338 | Family1721  |
| BlockID: Pso_101 | Present (diff. copies) |           |             |           |             |
|                  | Block EXISTS           | Ps_140480 | Family121   | Ps_140481 | Family1402  |



|                                      |                      |           |             |           |             |
|--------------------------------------|----------------------|-----------|-------------|-----------|-------------|
|                                      | Block DOES NOT EXIST | Ps_140482 | Family12453 | Ps_140483 | Family121   |
| BlockID: Pso_102 Gene missing        |                      |           |             |           |             |
|                                      | Block DOES NOT EXIST | Ps_129701 | Family9     | Ps_129702 | No families |
|                                      | Block DOES NOT EXIST | Ps_139298 | No families | Ps_139299 | Family9     |
| BlockID: Pso_103 Dissimilar families |                      |           |             |           |             |
|                                      | Block DOES NOT EXIST | Ps_129267 | Family16331 | Ps_129268 | Family75    |
|                                      | Block EXISTS         | Ps_129560 | Family743   | Ps_129561 | Family75    |
| BlockID: Pso_104 Present             |                      |           |             |           |             |
|                                      | Block DOES NOT EXIST | Ps_137149 | Family10419 | Ps_137150 | Family1479  |
|                                      | Block EXISTS         | Ps_137211 | Family58    | Ps_137212 | Family1479  |
|                                      | Block EXISTS         | Ps_138901 | Family58    | Ps_138902 | Family1479  |
|                                      | Block EXISTS         | Ps_141990 | Family58    | Ps_141991 | Family1479  |
|                                      | Block EXISTS         | Ps_143081 | Family1479  | Ps_143082 | Family58    |
| BlockID: Pso_105 Present             |                      |           |             |           |             |
|                                      | Block EXISTS         | Ps_130353 | Family1479  | Ps_130354 | Family698   |
|                                      | Block EXISTS         | Ps_137150 | Family1479  | Ps_137151 | Family698   |
|                                      | Block EXISTS         | Ps_142396 | Family1479  | Ps_142397 | Family698   |
| BlockID: Pso_106 Present             |                      |           |             |           |             |
|                                      | Block DOES NOT EXIST | Ps_132003 | Family38    | Ps_132004 | Family10696 |
|                                      | Block EXISTS         | Ps_132042 | Family25    | Ps_132043 | Family38    |
|                                      | Block EXISTS         | Ps_139169 | Family38    | Ps_139170 | Family25    |
|                                      | Block EXISTS         | Ps_141138 | Family38    | Ps_141139 | Family3145  |
|                                      | Block EXISTS         | Ps_141150 | Family38    | Ps_141152 | Family3145  |
|                                      | Block EXISTS         | Ps_142146 | Family38    | Ps_142147 | Family25    |
|                                      | Block DOES NOT EXIST | Ps_144157 | Family25    | Ps_144158 | Family473   |
| BlockID: Pso_107 Present             |                      |           |             |           |             |
|                                      | Block EXISTS         | Ps_135482 | Family84    | Ps_135483 | Family38    |
|                                      | Block EXISTS         | Ps_138608 | Family38    | Ps_138609 | Family84    |
| BlockID: Pso_108 Dissimilar families |                      |           |             |           |             |
|                                      | Block DOES NOT EXIST | Ps_128100 | Family38    | Ps_128101 | Family18790 |
|                                      | Block DOES NOT EXIST | Ps_128103 | Family18790 | Ps_128104 | Family726   |
| BlockID: Pso_109 Present             |                      |           |             |           |             |
|                                      | Block DOES NOT EXIST | Ps_115857 | Family491   | Ps_133938 | Family16745 |
|                                      | Block EXISTS         | Ps_133330 | Family113   | Ps_133331 | Family491   |
|                                      | Block EXISTS         | Ps_133936 | Family491   | Ps_133937 | Family113   |
| BlockID: Pso_11 Gene missing         |                      |           |             |           |             |
|                                      | Block DOES NOT EXIST | Ps_131665 | Family270   | Ps_131666 | No families |
|                                      | Block DOES NOT EXIST | Ps_131678 | No families | Ps_131679 | Family270   |
| BlockID: Pso_110 Present             |                      |           |             |           |             |
|                                      | Block EXISTS         | Ps_144653 | Family4977  | Ps_144654 | Family2316  |
|                                      | Block EXISTS         | Ps_144656 | Family2316  | Ps_144657 | Family4977  |
| BlockID: Pso_111 Gene missing        |                      |           |             |           |             |
|                                      | Block DOES NOT EXIST | Ps_139665 | Family683   | Ps_139666 | No families |
|                                      | Block DOES NOT EXIST | Ps_143765 | No families | Ps_143766 | Family683   |
| BlockID: Pso_112 Gene missing        |                      |           |             |           |             |
|                                      | Block DOES NOT EXIST | Ps_130154 | No families | Ps_130155 | Family9902  |
|                                      | Block DOES NOT EXIST | Ps_131742 | Family6979  | Ps_131743 | No families |
| BlockID: Pso_113 Dissimilar families |                      |           |             |           |             |
|                                      | Block DOES NOT EXIST | Ps_129289 | Family31410 | Ps_129290 | Family75    |
|                                      | Block EXISTS         | Ps_129297 | Family421   | Ps_129298 | Family75    |
| BlockID: Pso_114 Gene missing        |                      |           |             |           |             |
|                                      | Block DOES NOT EXIST | Ps_136256 | No families | Ps_136257 | Family18166 |
|                                      | Block DOES NOT EXIST | Ps_142086 | No families | Ps_142087 | Family18166 |
| BlockID: Pso_115 Dissimilar families |                      |           |             |           |             |
|                                      | Block DOES NOT EXIST | Ps_127051 | Family117   | Ps_127053 | No families |
|                                      | Block DOES NOT EXIST | Ps_130611 | No families | Ps_130612 | Family117   |
|                                      | Block DOES NOT EXIST | Ps_135734 | Family386   | Ps_135735 | No families |
|                                      | Block DOES NOT EXIST | Ps_138492 | Family10948 | Ps_138494 | Family386   |
|                                      | Block DOES NOT EXIST | Ps_144023 | Family117   | Ps_144025 | No families |
| BlockID: Pso_116 Dissimilar families |                      |           |             |           |             |

|                                         |                      |           |             |           |             |
|-----------------------------------------|----------------------|-----------|-------------|-----------|-------------|
|                                         | Block DOES NOT EXIST | Ps_111966 | Family18761 | Ps_129487 | Family12285 |
|                                         | Block DOES NOT EXIST | Ps_115742 | Family31189 | Ps_115743 | Family197   |
| BlockID: Pso_117 Gene missing           |                      |           |             |           |             |
|                                         | Block DOES NOT EXIST | Ps_131839 | No families | Ps_131840 | Family1646  |
|                                         | Block DOES NOT EXIST | Ps_143242 | Family1646  | Ps_143243 | No families |
| BlockID: Pso_118 Dissimilar families    |                      |           |             |           |             |
|                                         | Block DOES NOT EXIST | Ps_129693 | Family31422 | Ps_129694 | Family117   |
|                                         | Block DOES NOT EXIST | Ps_132885 | Family18793 | Ps_132886 | Family2021  |
|                                         | Block DOES NOT EXIST | Ps_140829 | Family386   | Ps_140833 | Family14671 |
|                                         | Block DOES NOT EXIST | Ps_144518 | Family117   | Ps_144519 | Family12500 |
| BlockID: Pso_119 Present (diff. copies) |                      |           |             |           |             |
|                                         | Block EXISTS         | Ps_133798 | Family386   | Ps_133799 | Family4     |
|                                         | Block DOES NOT EXIST | Ps_139191 | Family117   | Ps_139192 | Family4     |
| BlockID: Pso_12 Dissimilar families     |                      |           |             |           |             |
|                                         | Block DOES NOT EXIST | Ps_135533 | Family79    | Ps_135534 | Family89    |
|                                         | Block DOES NOT EXIST | Ps_141316 | Family9791  | Ps_141317 | Family79    |
| BlockID: Pso_120 Dissimilar families    |                      |           |             |           |             |
|                                         | Block DOES NOT EXIST | Ps_127050 | Family2     | Ps_127051 | Family117   |
|                                         | Block DOES NOT EXIST | Ps_132799 | Family117   | Ps_132800 | Family1213  |
| BlockID: Pso_121 Gene missing           |                      |           |             |           |             |
|                                         | Block DOES NOT EXIST | Ps_129127 | Family386   | Ps_129129 | No families |
|                                         | Block DOES NOT EXIST | Ps_131984 | No families | Ps_131985 | Family117   |
| BlockID: Pso_122 Present                |                      |           |             |           |             |
|                                         | Block EXISTS         | Ps_128066 | Family84    | Ps_128069 | Family117   |
|                                         | Block EXISTS         | Ps_139823 | Family117   | Ps_139825 | Family84    |
| BlockID: Pso_123 Gene missing           |                      |           |             |           |             |
|                                         | Block DOES NOT EXIST | Ps_129542 | No families | Ps_129543 | Family117   |
|                                         | Block DOES NOT EXIST | Ps_143655 | Family117   | Ps_143660 | Family12285 |
| BlockID: Pso_124 Present (diff. copies) |                      |           |             |           |             |
|                                         | Block DOES NOT EXIST | Ps_129905 | Family117   | Ps_129908 | Family11941 |
|                                         | Block DOES NOT EXIST | Ps_130970 | Family386   | Ps_130972 | Family11793 |
|                                         | Block EXISTS         | Ps_137712 | Family386   | Ps_137714 | Family4     |
| BlockID: Pso_125 Present                |                      |           |             |           |             |
|                                         | Block EXISTS         | Ps_129460 | Family14670 | Ps_129461 | Family12503 |
|                                         | Block EXISTS         | Ps_129621 | Family12503 | Ps_129622 | Family14670 |
| BlockID: Pso_126 Present                |                      |           |             |           |             |
|                                         | Block EXISTS         | Ps_141973 | Family231   | Ps_141974 | Family356   |
|                                         | Block EXISTS         | Ps_141975 | Family356   | Ps_141976 | Family231   |
| BlockID: Pso_127 Present                |                      |           |             |           |             |
|                                         | Block EXISTS         | Ps_108703 | Family223   | Ps_133444 | Family289   |
|                                         | Block EXISTS         | Ps_131520 | Family289   | Ps_131521 | Family223   |
| BlockID: Pso_128 Present                |                      |           |             |           |             |
|                                         | Block EXISTS         | Ps_109654 | Family2789  | Ps_144596 | Family2027  |
|                                         | Block EXISTS         | Ps_143826 | Family2027  | Ps_143827 | Family2789  |
| BlockID: Pso_129 Dissimilar families    |                      |           |             |           |             |
|                                         | Block DOES NOT EXIST | Ps_134650 | Family7531  | Ps_134651 | Family548   |
|                                         | Block DOES NOT EXIST | Ps_134656 | Family1602  | Ps_157017 | Family548   |
| BlockID: Pso_13 Dissimilar families     |                      |           |             |           |             |
|                                         | Block DOES NOT EXIST | Ps_132699 | Family1076  | Ps_156551 | Family6175  |
|                                         | Block DOES NOT EXIST | Ps_135329 | Family1076  | Ps_135330 | Family1069  |
| BlockID: Pso_130 Present                |                      |           |             |           |             |
|                                         | Block EXISTS         | Ps_141895 | Family853   | Ps_141896 | Family206   |
|                                         | Block EXISTS         | Ps_142215 | Family206   | Ps_158491 | Family853   |
| BlockID: Pso_131 Gene missing           |                      |           |             |           |             |
|                                         | Block DOES NOT EXIST | Ps_129903 | Family8702  | Ps_129904 | No families |
|                                         | Block DOES NOT EXIST | Ps_144897 | No families | Ps_144898 | Family31943 |
| BlockID: Pso_132 Gene missing           |                      |           |             |           |             |
|                                         | Block DOES NOT EXIST | Ps_141914 | Family233   | Ps_141915 | No families |
|                                         | Block DOES NOT EXIST | Ps_142408 | Family233   | Ps_142410 | Family2     |
| BlockID: Pso_133 Gene missing           |                      |           |             |           |             |

|                                         |                      |           |             |           |             |
|-----------------------------------------|----------------------|-----------|-------------|-----------|-------------|
|                                         | Block DOES NOT EXIST | Ps_136669 | Family2043  | Ps_136670 | No families |
|                                         | Block DOES NOT EXIST | Ps_143954 | No families | Ps_143955 | Family2043  |
| BlockID: Pso_134 Dissimilar families    |                      |           |             |           |             |
|                                         | Block DOES NOT EXIST | Ps_127638 | Family31355 | Ps_127639 | Family4845  |
|                                         | Block DOES NOT EXIST | Ps_131325 | Family4845  | Ps_131326 | Family31474 |
| BlockID: Pso_135 Present                |                      |           |             |           |             |
|                                         | Block EXISTS         | Ps_142760 | Family41    | Ps_142761 | Family3118  |
|                                         | Block EXISTS         | Ps_143984 | Family41    | Ps_143986 | Family3118  |
| BlockID: Pso_136 Dissimilar families    |                      |           |             |           |             |
|                                         | Block DOES NOT EXIST | Ps_108330 | Family8622  | Ps_129021 | No families |
|                                         | Block DOES NOT EXIST | Ps_111565 | Family303   | Ps_129035 | Family539   |
| BlockID: Pso_137 Dissimilar families    |                      |           |             |           |             |
|                                         | Block DOES NOT EXIST | Ps_139693 | Family802   | Ps_139694 | Family9     |
|                                         | Block DOES NOT EXIST | Ps_139696 | Family802   | Ps_139699 | Family10573 |
| BlockID: Pso_138 Present                |                      |           |             |           |             |
|                                         | Block EXISTS         | Ps_127493 | Family222   | Ps_127495 | Family117   |
|                                         | Block EXISTS         | Ps_134513 | Family222   | Ps_134517 | Family117   |
|                                         | Block EXISTS         | Ps_137742 | Family222   | Ps_137744 | Family117   |
|                                         | Block DOES NOT EXIST | Ps_138989 | Family222   | Ps_138990 | Family386   |
|                                         | Block DOES NOT EXIST | Ps_141779 | Family117   | Ps_141780 | Family1113  |
|                                         | Block EXISTS         | Ps_143247 | Family222   | Ps_143250 | Family117   |
| BlockID: Pso_139 Present                |                      |           |             |           |             |
|                                         | Block EXISTS         | Ps_130788 | Family21    | Ps_130789 | Family95    |
|                                         | Block EXISTS         | Ps_130803 | Family21    | Ps_130804 | Family95    |
| BlockID: Pso_14 Dissimilar families     |                      |           |             |           |             |
|                                         | Block DOES NOT EXIST | Ps_136988 | Family75    | Ps_136989 | Family274   |
|                                         | Block DOES NOT EXIST | Ps_144704 | Family1977  | Ps_144705 | Family274   |
| BlockID: Pso_140 Present (diff. copies) |                      |           |             |           |             |
|                                         | Block EXISTS         | Ps_137950 | Family4618  | Ps_137951 | Family715   |
|                                         | Block DOES NOT EXIST | Ps_142882 | Family17890 | Ps_142883 | Family4618  |
| BlockID: Pso_141 Dissimilar families    |                      |           |             |           |             |
|                                         | Block DOES NOT EXIST | Ps_143904 | Family136   | Ps_143905 | Family8812  |
|                                         | Block DOES NOT EXIST | Ps_143906 | Family467   | Ps_143907 | Family136   |
| BlockID: Pso_142 Present                |                      |           |             |           |             |
|                                         | Block DOES NOT EXIST | Ps_127138 | Family25552 | Ps_127139 | Family64    |
|                                         | Block EXISTS         | Ps_127475 | Family656   | Ps_127476 | Family64    |
|                                         | Block DOES NOT EXIST | Ps_128092 | No families | Ps_128093 | Family64    |
|                                         | Block EXISTS         | Ps_128849 | Family967   | Ps_128850 | Family64    |
|                                         | Block EXISTS         | Ps_129016 | Family967   | Ps_129017 | Family64    |
|                                         | Block EXISTS         | Ps_130532 | Family967   | Ps_130533 | Family64    |
|                                         | Block EXISTS         | Ps_130742 | Family656   | Ps_130743 | Family635   |
|                                         | Block DOES NOT EXIST | Ps_130839 | Family64    | Ps_130840 | No families |
|                                         | Block DOES NOT EXIST | Ps_131751 | No families | Ps_131752 | Family64    |
|                                         | Block EXISTS         | Ps_131894 | Family64    | Ps_131895 | Family10731 |
|                                         | Block EXISTS         | Ps_132216 | Family967   | Ps_132217 | Family64    |
|                                         | Block EXISTS         | Ps_132879 | Family64    | Ps_132880 | Family967   |
|                                         | Block EXISTS         | Ps_133101 | Family64    | Ps_133102 | Family967   |
|                                         | Block DOES NOT EXIST | Ps_133103 | Family64    | Ps_133104 | No families |
|                                         | Block EXISTS         | Ps_133843 | Family656   | Ps_133844 | Family64    |
|                                         | Block EXISTS         | Ps_135092 | Family656   | Ps_135093 | Family635   |
|                                         | Block EXISTS         | Ps_136516 | Family490   | Ps_136517 | Family64    |
|                                         | Block EXISTS         | Ps_137183 | Family64    | Ps_137184 | Family656   |
|                                         | Block EXISTS         | Ps_138149 | Family64    | Ps_138150 | Family10731 |
|                                         | Block EXISTS         | Ps_138535 | Family967   | Ps_138536 | Family64    |
|                                         | Block EXISTS         | Ps_138837 | Family64    | Ps_138838 | Family967   |
|                                         | Block DOES NOT EXIST | Ps_138951 | No families | Ps_138952 | Family31725 |
|                                         | Block EXISTS         | Ps_139062 | Family64    | Ps_139063 | Family10731 |
|                                         | Block EXISTS         | Ps_141970 | Family656   | Ps_141971 | Family64    |
|                                         | Block EXISTS         | Ps_143844 | Family656   | Ps_143845 | Family635   |
|                                         | Block DOES NOT EXIST | Ps_144187 | No families | Ps_144188 | Family64    |

|                                      |                      |           |             |           |             |
|--------------------------------------|----------------------|-----------|-------------|-----------|-------------|
| BlockID: Pso_143 Present             |                      |           |             |           |             |
|                                      | Block EXISTS         | Ps_120228 | Family740   | Ps_139405 | Family228   |
|                                      | Block EXISTS         | Ps_136457 | Family740   | Ps_136458 | Family228   |
|                                      | Block EXISTS         | Ps_139400 | Family740   | Ps_139401 | Family228   |
| BlockID: Pso_144 Gene missing        |                      |           |             |           |             |
|                                      | Block DOES NOT EXIST | Ps_132590 | No families | Ps_132591 | Family84    |
|                                      | Block DOES NOT EXIST | Ps_141876 | Family84    | Ps_141877 | No families |
| BlockID: Pso_145 Present             |                      |           |             |           |             |
|                                      | Block EXISTS         | Ps_135764 | Family1012  | Ps_135765 | Family10064 |
|                                      | Block EXISTS         | Ps_158968 | Family10064 | Ps_158969 | Family1012  |
| BlockID: Pso_146 Present             |                      |           |             |           |             |
|                                      | Block DOES NOT EXIST | Ps_137147 | Family698   | Ps_137148 | Family4710  |
|                                      | Block EXISTS         | Ps_138905 | Family14439 | Ps_138906 | Family698   |
|                                      | Block EXISTS         | Ps_141430 | Family698   | Ps_141431 | Family6914  |
|                                      | Block EXISTS         | Ps_141433 | Family698   | Ps_141434 | Family14439 |
|                                      | Block EXISTS         | Ps_143762 | Family698   | Ps_143763 | Family6914  |
| BlockID: Pso_147 Present             |                      |           |             |           |             |
|                                      | Block EXISTS         | Ps_135217 | Family581   | Ps_135218 | Family8521  |
|                                      | Block EXISTS         | Ps_135219 | Family581   | Ps_135220 | Family8521  |
| BlockID: Pso_148 Gene missing        |                      |           |             |           |             |
|                                      | Block DOES NOT EXIST | Ps_132038 | Family553   | Ps_132039 | No families |
|                                      | Block DOES NOT EXIST | Ps_134401 | Family31572 | Ps_134402 | No families |
| BlockID: Pso_149 Present             |                      |           |             |           |             |
|                                      | Block EXISTS         | Ps_127831 | Family8457  | Ps_127832 | Family1079  |
|                                      | Block EXISTS         | Ps_138463 | Family1079  | Ps_138464 | Family8457  |
| BlockID: Pso_15 Dissimilar families  |                      |           |             |           |             |
|                                      | Block DOES NOT EXIST | Ps_132225 | Family673   | Ps_132226 | Family31501 |
|                                      | Block DOES NOT EXIST | Ps_132227 | Family52    | Ps_132228 | Family8816  |
|                                      | Block DOES NOT EXIST | Ps_140272 | Family673   | Ps_140273 | Family8816  |
| BlockID: Pso_150 Present             |                      |           |             |           |             |
|                                      | Block EXISTS         | Ps_129395 | Family827   | Ps_129396 | Family1974  |
|                                      | Block EXISTS         | Ps_140570 | Family1974  | Ps_140571 | Family827   |
| BlockID: Pso_151 Present             |                      |           |             |           |             |
|                                      | Block EXISTS         | Ps_131237 | Family585   | Ps_131238 | Family1078  |
|                                      | Block EXISTS         | Ps_133241 | Family1078  | Ps_133243 | Family585   |
|                                      | Block DOES NOT EXIST | Ps_143134 | Family585   | Ps_158705 | Family8391  |
| BlockID: Pso_152 Dissimilar families |                      |           |             |           |             |
|                                      | Block DOES NOT EXIST | Ps_109644 | Family7     | Ps_144505 | Family1911  |
|                                      | Block DOES NOT EXIST | Ps_139316 | Family676   | Ps_139317 | Family7     |
| BlockID: Pso_153 Dissimilar families |                      |           |             |           |             |
|                                      | Block DOES NOT EXIST | Ps_140053 | Family29433 | Ps_140054 | Family6189  |
|                                      | Block DOES NOT EXIST | Ps_140056 | Family6189  | Ps_140057 | Family1401  |
| BlockID: Pso_154 Dissimilar families |                      |           |             |           |             |
|                                      | Block DOES NOT EXIST | Ps_140693 | Family733   | Ps_140694 | Family53    |
|                                      | Block DOES NOT EXIST | Ps_140708 | Family606   | Ps_140709 | Family733   |
| BlockID: Pso_155 Gene missing        |                      |           |             |           |             |
|                                      | Block DOES NOT EXIST | Ps_137295 | No families | Ps_137296 | Family12511 |
|                                      | Block DOES NOT EXIST | Ps_137297 | Family12511 | Ps_137298 | No families |
| BlockID: Pso_156 Gene missing        |                      |           |             |           |             |
|                                      | Block DOES NOT EXIST | Ps_138537 | Family74    | Ps_138538 | Family18843 |
|                                      | Block DOES NOT EXIST | Ps_138542 | No families | Ps_138543 | Family74    |
| BlockID: Pso_157 Gene missing        |                      |           |             |           |             |
|                                      | Block DOES NOT EXIST | Ps_138682 | Family6191  | Ps_138683 | No families |
|                                      | Block DOES NOT EXIST | Ps_143546 | No families | Ps_143547 | Family6191  |
| BlockID: Pso_158 Dissimilar families |                      |           |             |           |             |
|                                      | Block DOES NOT EXIST | Ps_128390 | Family84    | Ps_128392 | Family10764 |
|                                      | Block DOES NOT EXIST | Ps_139943 | Family84    | Ps_139944 | Family28585 |
| BlockID: Pso_159 Present             |                      |           |             |           |             |
|                                      | Block EXISTS         | Ps_138764 | Family64    | Ps_138765 | Family84    |
|                                      | Block EXISTS         | Ps_139060 | Family84    | Ps_139062 | Family64    |

|                                         |                      |           |             |           |             |
|-----------------------------------------|----------------------|-----------|-------------|-----------|-------------|
| BlockID: Pso_16 Present (diff. copies)  |                      |           |             |           |             |
|                                         | Block EXISTS         | Ps_109619 | Family250   | Ps_144173 | Family52    |
|                                         | Block DOES NOT EXIST | Ps_124664 | Family673   | Ps_144176 | Family250   |
| BlockID: Pso_160 Present                |                      |           |             |           |             |
|                                         | Block EXISTS         | Ps_108235 | Family112   | Ps_128058 | Family84    |
|                                         | Block EXISTS         | Ps_108238 | Family112   | Ps_128066 | Family84    |
| BlockID: Pso_161 Gene missing           |                      |           |             |           |             |
|                                         | Block DOES NOT EXIST | Ps_138109 | No families | Ps_138110 | Family84    |
|                                         | Block DOES NOT EXIST | Ps_141516 | Family84    | Ps_141517 | Family11386 |
| BlockID: Pso_162 Dissimilar families    |                      |           |             |           |             |
|                                         | Block DOES NOT EXIST | Ps_131174 | Family165   | Ps_131175 | Family6892  |
|                                         | Block DOES NOT EXIST | Ps_131176 | Family755   | Ps_131177 | Family165   |
| BlockID: Pso_163 Present                |                      |           |             |           |             |
|                                         | Block DOES NOT EXIST | Ps_140284 | No families | Ps_140285 | Family654   |
|                                         | Block EXISTS         | Ps_141659 | Family654   | Ps_141660 | Family7     |
|                                         | Block EXISTS         | Ps_141663 | Family7     | Ps_141664 | Family654   |
| BlockID: Pso_164 Present                |                      |           |             |           |             |
|                                         | Block EXISTS         | Ps_133852 | Family9364  | Ps_133853 | Family165   |
|                                         | Block EXISTS         | Ps_133855 | Family9364  | Ps_133856 | Family165   |
| BlockID: Pso_165 Present (diff. copies) |                      |           |             |           |             |
|                                         | Block EXISTS         | Ps_132224 | Family12503 | Ps_132225 | Family673   |
|                                         | Block DOES NOT EXIST | Ps_140270 | Family52    | Ps_140271 | Family12503 |
| BlockID: Pso_166 Gene missing           |                      |           |             |           |             |
|                                         | Block DOES NOT EXIST | Ps_130561 | No families | Ps_130562 | No families |
|                                         | Block DOES NOT EXIST | Ps_132904 | Family244   | Ps_132905 | No families |
|                                         | Block DOES NOT EXIST | Ps_140484 | Family1267  | Ps_140485 | No families |
| BlockID: Pso_167 Gene missing           |                      |           |             |           |             |
|                                         | Block DOES NOT EXIST | Ps_140619 | Family244   | Ps_140620 | No families |
|                                         | Block DOES NOT EXIST | Ps_142158 | No families | Ps_142159 | No families |
| BlockID: Pso_168 Present                |                      |           |             |           |             |
|                                         | Block EXISTS         | Ps_139989 | Family1036  | Ps_139990 | Family239   |
|                                         | Block EXISTS         | Ps_140001 | Family239   | Ps_140002 | Family1036  |
| BlockID: Pso_169 Dissimilar families    |                      |           |             |           |             |
|                                         | Block EXISTS         | Ps_130470 | Family1404  | Ps_130471 | Family1136  |
|                                         | Block DOES NOT EXIST | Ps_132072 | Family1136  | Ps_132073 | Family15610 |
| BlockID: Pso_17 Present (diff. copies)  |                      |           |             |           |             |
|                                         | Block DOES NOT EXIST | Ps_134036 | Family11969 | Ps_134038 | Family12299 |
|                                         | Block EXISTS         | Ps_141027 | Family14023 | Ps_141028 | Family12299 |
| BlockID: Pso_170 Dissimilar families    |                      |           |             |           |             |
|                                         | Block DOES NOT EXIST | Ps_109283 | Family13853 | Ps_140348 | Family1252  |
|                                         | Block DOES NOT EXIST | Ps_140345 | Family1252  | Ps_140346 | Family154   |
| BlockID: Pso_171 Present                |                      |           |             |           |             |
|                                         | Block EXISTS         | Ps_131939 | Family170   | Ps_131940 | Family1138  |
|                                         | Block EXISTS         | Ps_141758 | Family1138  | Ps_141759 | Family170   |
| BlockID: Pso_172 Gene missing           |                      |           |             |           |             |
|                                         | Block DOES NOT EXIST | Ps_113004 | Family641   | Ps_130564 | Family27    |
|                                         | Block DOES NOT EXIST | Ps_130565 | No families | Ps_130566 | Family27    |
| BlockID: Pso_173 Present                |                      |           |             |           |             |
|                                         | Block EXISTS         | Ps_138389 | Family15    | Ps_138390 | Family11608 |
|                                         | Block EXISTS         | Ps_139420 | Family15    | Ps_139421 | Family11608 |
| BlockID: Pso_174 Present                |                      |           |             |           |             |
|                                         | Block EXISTS         | Ps_132585 | Family66    | Ps_132586 | Family129   |
|                                         | Block EXISTS         | Ps_132595 | Family66    | Ps_132597 | Family129   |
| BlockID: Pso_175 Present (diff. copies) |                      |           |             |           |             |
|                                         | Block DOES NOT EXIST | Ps_128824 | Family1066  | Ps_128825 | No families |
|                                         | Block DOES NOT EXIST | Ps_131290 | Family1066  | Ps_131291 | No families |
|                                         | Block EXISTS         | Ps_143952 | Family233   | Ps_143953 | Family1066  |
|                                         | Block DOES NOT EXIST | Ps_144194 | Family1066  | Ps_144195 | No families |
| BlockID: Pso_176 Present                |                      |           |             |           |             |
|                                         | Block EXISTS         | Ps_108381 | Family513   | Ps_129396 | Family1974  |

|                                      |                      |           |             |           |             |
|--------------------------------------|----------------------|-----------|-------------|-----------|-------------|
|                                      | Block EXISTS         | Ps_140569 | Family513   | Ps_140570 | Family1974  |
| BlockID: Pso_177 Dissimilar families |                      |           |             |           |             |
|                                      | Block DOES NOT EXIST | Ps_139001 | Family755   | Ps_139002 | Family6734  |
|                                      | Block DOES NOT EXIST | Ps_139006 | Family446   | Ps_139007 | Family1679  |
| BlockID: Pso_178 Present             |                      |           |             |           |             |
|                                      | Block EXISTS         | Ps_108239 | Family112   | Ps_110682 | Family14658 |
|                                      | Block EXISTS         | Ps_110691 | Family112   | Ps_128075 | Family14658 |
|                                      | Block EXISTS         | Ps_110709 | Family112   | Ps_110713 | Family14658 |
| BlockID: Pso_179 Dissimilar families |                      |           |             |           |             |
|                                      | Block DOES NOT EXIST | Ps_138566 | Family11647 | Ps_138567 | Family33    |
|                                      | Block DOES NOT EXIST | Ps_138568 | Family33    | Ps_138569 | Family7958  |
| BlockID: Pso_18 Present              |                      |           |             |           |             |
|                                      | Block EXISTS         | Ps_109553 | Family2286  | Ps_143353 | Family18837 |
|                                      | Block EXISTS         | Ps_118708 | Family2286  | Ps_137510 | Family18837 |
| BlockID: Pso_180 Present             |                      |           |             |           |             |
|                                      | Block EXISTS         | Ps_108627 | Family559   | Ps_132443 | Family2114  |
|                                      | Block EXISTS         | Ps_109504 | Family559   | Ps_142727 | Family2114  |
| BlockID: Pso_181 Present             |                      |           |             |           |             |
|                                      | Block EXISTS         | Ps_108581 | Family1412  | Ps_131700 | Family524   |
|                                      | Block EXISTS         | Ps_108582 | Family1412  | Ps_131702 | Family524   |
| BlockID: Pso_182 Present             |                      |           |             |           |             |
|                                      | Block EXISTS         | Ps_110348 | Family18759 | Ps_110356 | Family14657 |
|                                      | Block EXISTS         | Ps_125450 | Family14657 | Ps_125453 | Family18759 |
| BlockID: Pso_183 Present             |                      |           |             |           |             |
|                                      | Block EXISTS         | Ps_130852 | Family724   | Ps_130853 | Family725   |
|                                      | Block EXISTS         | Ps_139082 | Family724   | Ps_139083 | Family725   |
|                                      | Block EXISTS         | Ps_141060 | Family724   | Ps_141061 | Family725   |
| BlockID: Pso_184 Present             |                      |           |             |           |             |
|                                      | Block EXISTS         | Ps_140630 | Family1913  | Ps_140631 | Family1912  |
|                                      | Block EXISTS         | Ps_143477 | Family1913  | Ps_143478 | Family1912  |
| BlockID: Pso_185 Gene missing        |                      |           |             |           |             |
|                                      | Block DOES NOT EXIST | Ps_134316 | Family16579 | Ps_134318 | No families |
|                                      | Block DOES NOT EXIST | Ps_134321 | Family10638 | Ps_134322 | Family16579 |
| BlockID: Pso_186 Present             |                      |           |             |           |             |
|                                      | Block EXISTS         | Ps_134611 | Family6390  | Ps_134612 | Family53    |
|                                      | Block EXISTS         | Ps_139430 | Family6390  | Ps_139431 | Family53    |
| BlockID: Pso_187 Present             |                      |           |             |           |             |
|                                      | Block EXISTS         | Ps_128347 | Family901   | Ps_128348 | Family2614  |
|                                      | Block EXISTS         | Ps_143533 | Family2614  | Ps_143534 | Family901   |
|                                      | Block DOES NOT EXIST | Ps_143818 | Family2614  | Ps_143819 | Family233   |
| BlockID: Pso_188 Present             |                      |           |             |           |             |
|                                      | Block EXISTS         | Ps_132454 | Family982   | Ps_132455 | Family1198  |
|                                      | Block EXISTS         | Ps_132458 | Family982   | Ps_132459 | Family1739  |
| BlockID: Pso_189 Present             |                      |           |             |           |             |
|                                      | Block EXISTS         | Ps_130879 | Family10504 | Ps_130880 | Family11042 |
|                                      | Block EXISTS         | Ps_130940 | Family10504 | Ps_130941 | Family11042 |
|                                      | Block EXISTS         | Ps_138598 | Family11042 | Ps_138599 | Family10504 |
| BlockID: Pso_19 Present              |                      |           |             |           |             |
|                                      | Block EXISTS         | Ps_109178 | Family107   | Ps_138872 | Family39    |
|                                      | Block EXISTS         | Ps_138876 | Family107   | Ps_138877 | Family39    |
| BlockID: Pso_190 Dissimilar families |                      |           |             |           |             |
|                                      | Block DOES NOT EXIST | Ps_141354 | Family11709 | Ps_141355 | Family9802  |
|                                      | Block DOES NOT EXIST | Ps_141391 | Family9802  | Ps_141392 | Family12111 |
| BlockID: Pso_191 Dissimilar families |                      |           |             |           |             |
|                                      | Block DOES NOT EXIST | Ps_109431 | Family1130  | Ps_141905 | Family7295  |
|                                      | Block DOES NOT EXIST | Ps_109432 | Family1130  | Ps_141912 | Family2     |
| BlockID: Pso_192 Dissimilar families |                      |           |             |           |             |
|                                      | Block DOES NOT EXIST | Ps_135852 | Family2     | Ps_135853 | Family5166  |
|                                      | Block DOES NOT EXIST | Ps_156556 | Family3222  | Ps_156558 | Family2     |
| BlockID: Pso_193 Present             |                      |           |             |           |             |

|                                       |                      |           |             |           |             |
|---------------------------------------|----------------------|-----------|-------------|-----------|-------------|
|                                       | Block EXISTS         | Ps_128204 | Family9390  | Ps_128205 | Family2     |
|                                       | Block EXISTS         | Ps_141912 | Family2     | Ps_141913 | Family9390  |
| BlockID: Pso_194 Present              |                      |           |             |           |             |
|                                       | Block EXISTS         | Ps_109578 | Family7     | Ps_143680 | Family2     |
|                                       | Block EXISTS         | Ps_138853 | Family7     | Ps_138854 | Family2     |
| BlockID: Pso_195 Present              |                      |           |             |           |             |
|                                       | Block EXISTS         | Ps_131096 | Family2     | Ps_131097 | Family8     |
|                                       | Block EXISTS         | Ps_131109 | Family2     | Ps_131110 | Family8     |
| BlockID: Pso_196 Present              |                      |           |             |           |             |
|                                       | Block EXISTS         | Ps_135757 | Family86    | Ps_135758 | Family2     |
|                                       | Block EXISTS         | Ps_136289 | Family2     | Ps_136290 | Family86    |
| BlockID: Pso_197 Dissimilar families  |                      |           |             |           |             |
|                                       | Block DOES NOT EXIST | Ps_130151 | Family12299 | Ps_130153 | Family554   |
|                                       | Block DOES NOT EXIST | Ps_130694 | Family12379 | Ps_130696 | Family554   |
| BlockID: Pso_198 Present              |                      |           |             |           |             |
|                                       | Block EXISTS         | Ps_134986 | Family1703  | Ps_134987 | Family8498  |
|                                       | Block EXISTS         | Ps_138978 | Family1703  | Ps_138979 | Family8498  |
|                                       | Block DOES NOT EXIST | Ps_143192 | Family6650  | Ps_143193 | Family1703  |
| BlockID: Pso_199 Dissimilar families  |                      |           |             |           |             |
|                                       | Block DOES NOT EXIST | Ps_135908 | Family103   | Ps_135909 | Family17145 |
|                                       | Block DOES NOT EXIST | Ps_135910 | Family237   | Ps_135911 | Family103   |
| BlockID: Pso_2 Present (diff. copies) |                      |           |             |           |             |
|                                       | Block DOES NOT EXIST | Ps_138399 | Family31705 | Ps_138400 | Family18841 |
|                                       | Block EXISTS         | Ps_142341 | Family18841 | Ps_142342 | Family310   |
| BlockID: Pso_20 Present               |                      |           |             |           |             |
|                                       | Block EXISTS         | Ps_131970 | Family58    | Ps_131972 | Family432   |
|                                       | Block EXISTS         | Ps_141435 | Family58    | Ps_141436 | Family432   |
| BlockID: Pso_200 Gene missing         |                      |           |             |           |             |
|                                       | Block DOES NOT EXIST | Ps_139109 | Family268   | Ps_139110 | No families |
|                                       | Block DOES NOT EXIST | Ps_139112 | Family268   | Ps_139113 | Family638   |
| BlockID: Pso_201 Present              |                      |           |             |           |             |
|                                       | Block EXISTS         | Ps_123918 | Family350   | Ps_143557 | Family11735 |
|                                       | Block EXISTS         | Ps_123922 | Family350   | Ps_143565 | Family86    |
|                                       | Block EXISTS         | Ps_143738 | Family86    | Ps_143739 | Family350   |
| BlockID: Pso_202 Present              |                      |           |             |           |             |
|                                       | Block EXISTS         | Ps_128616 | Family1018  | Ps_128617 | Family4456  |
|                                       | Block EXISTS         | Ps_128618 | Family4456  | Ps_128619 | Family1018  |
| BlockID: Pso_203 Present              |                      |           |             |           |             |
|                                       | Block EXISTS         | Ps_132294 | Family2620  | Ps_132295 | Family7935  |
|                                       | Block EXISTS         | Ps_132297 | Family7935  | Ps_132298 | Family2620  |
| BlockID: Pso_204 Present              |                      |           |             |           |             |
|                                       | Block DOES NOT EXIST | Ps_119018 | Family18562 | Ps_138040 | Family11020 |
|                                       | Block DOES NOT EXIST | Ps_137148 | Family4710  | Ps_137149 | Family10419 |
|                                       | Block EXISTS         | Ps_138900 | Family4710  | Ps_138901 | Family58    |
|                                       | Block DOES NOT EXIST | Ps_141434 | Family14439 | Ps_141435 | Family58    |
|                                       | Block DOES NOT EXIST | Ps_141989 | Family8089  | Ps_141990 | Family58    |
|                                       | Block EXISTS         | Ps_143089 | Family58    | Ps_143090 | Family4710  |
|                                       | Block DOES NOT EXIST | Ps_143763 | Family6914  | Ps_143764 | Family10419 |
|                                       | Block EXISTS         | Ps_144851 | Family4710  | Ps_144852 | Family58    |
| BlockID: Pso_205 Dissimilar families  |                      |           |             |           |             |
|                                       | Block DOES NOT EXIST | Ps_113434 | Family16502 | Ps_131018 | Family389   |
|                                       | Block DOES NOT EXIST | Ps_113435 | Family604   | Ps_131020 | Family389   |
| BlockID: Pso_206 Present              |                      |           |             |           |             |
|                                       | Block EXISTS         | Ps_108581 | Family1412  | Ps_131698 | Family139   |
|                                       | Block EXISTS         | Ps_108582 | Family1412  | Ps_131704 | Family139   |
|                                       | Block EXISTS         | Ps_131739 | Family139   | Ps_156352 | Family1412  |
| BlockID: Pso_207 Dissimilar families  |                      |           |             |           |             |
|                                       | Block DOES NOT EXIST | Ps_133969 | Family16874 | Ps_133970 | Family20521 |
|                                       | Block DOES NOT EXIST | Ps_133979 | Family503   | Ps_133980 | Family3027  |
| BlockID: Pso_21 Dissimilar families   |                      |           |             |           |             |

|                 |                      |           |             |           |             |
|-----------------|----------------------|-----------|-------------|-----------|-------------|
|                 | Block DOES NOT EXIST | Ps_135081 | Family2529  | Ps_135082 | Family3483  |
|                 | Block DOES NOT EXIST | Ps_139165 | Family3483  | Ps_139166 | Family31732 |
| BlockID: Pso_22 | Dissimilar families  |           |             |           |             |
|                 | Block DOES NOT EXIST | Ps_129688 | Family17195 | Ps_129689 | Family8470  |
|                 | Block DOES NOT EXIST | Ps_141675 | Family9515  | Ps_141677 | Family8470  |
| BlockID: Pso_23 | Dissimilar families  |           |             |           |             |
|                 | Block DOES NOT EXIST | Ps_134351 | No families | Ps_134352 | Family34    |
|                 | Block DOES NOT EXIST | Ps_139125 | Family11386 | Ps_157939 | Family464   |
| BlockID: Pso_24 | Present              |           |             |           |             |
|                 | Block EXISTS         | Ps_136381 | Family1988  | Ps_157394 | Family37    |
|                 | Block EXISTS         | Ps_136404 | Family37    | Ps_136405 | Family1988  |
| BlockID: Pso_25 | Present              |           |             |           |             |
|                 | Block EXISTS         | Ps_140818 | Family2538  | Ps_140819 | Family385   |
|                 | Block EXISTS         | Ps_140820 | Family385   | Ps_140821 | Family2538  |
| BlockID: Pso_26 | Present              |           |             |           |             |
|                 | Block EXISTS         | Ps_139333 | Family222   | Ps_139334 | Family36    |
|                 | Block EXISTS         | Ps_139738 | Family36    | Ps_139739 | Family222   |
| BlockID: Pso_27 | Present              |           |             |           |             |
|                 | Block EXISTS         | Ps_108478 | Family14656 | Ps_156135 | Family128   |
|                 | Block EXISTS         | Ps_108480 | Family128   | Ps_130428 | Family14656 |
| BlockID: Pso_28 | Present              |           |             |           |             |
|                 | Block EXISTS         | Ps_130016 | Family432   | Ps_130017 | Family320   |
|                 | Block EXISTS         | Ps_131972 | Family432   | Ps_131973 | Family320   |
|                 | Block EXISTS         | Ps_132113 | Family1969  | Ps_132114 | Family320   |
|                 | Block EXISTS         | Ps_132495 | Family432   | Ps_132496 | Family320   |
|                 | Block EXISTS         | Ps_133346 | Family320   | Ps_133347 | Family432   |
|                 | Block EXISTS         | Ps_134070 | Family320   | Ps_134071 | Family1969  |
|                 | Block EXISTS         | Ps_135500 | Family432   | Ps_135501 | Family320   |
|                 | Block EXISTS         | Ps_136080 | Family1969  | Ps_136081 | Family320   |
|                 | Block EXISTS         | Ps_139610 | Family320   | Ps_139611 | Family432   |
|                 | Block EXISTS         | Ps_139946 | Family432   | Ps_139947 | Family320   |
|                 | Block EXISTS         | Ps_143216 | Family320   | Ps_143217 | Family1969  |
|                 | Block EXISTS         | Ps_143433 | Family320   | Ps_143434 | Family1969  |
| BlockID: Pso_29 | Dissimilar families  |           |             |           |             |
|                 | Block DOES NOT EXIST | Ps_133560 | Family821   | Ps_133561 | Family145   |
|                 | Block DOES NOT EXIST | Ps_142665 | Family145   | Ps_142666 | Family7099  |
| BlockID: Pso_3  | Present              |           |             |           |             |
|                 | Block EXISTS         | Ps_136920 | Family4     | Ps_136921 | Family78    |
|                 | Block EXISTS         | Ps_139213 | Family78    | Ps_139214 | Family4     |
| BlockID: Pso_30 | Dissimilar families  |           |             |           |             |
|                 | Block DOES NOT EXIST | Ps_122221 | Family4267  | Ps_141688 | Family13534 |
|                 | Block DOES NOT EXIST | Ps_143702 | Family11308 | Ps_143703 | Family4267  |
| BlockID: Pso_31 | Dissimilar families  |           |             |           |             |
|                 | Block DOES NOT EXIST | Ps_133959 | Family2773  | Ps_133960 | Family6732  |
|                 | Block DOES NOT EXIST | Ps_133963 | Family6732  | Ps_133964 | Family3450  |
| BlockID: Pso_32 | Present              |           |             |           |             |
|                 | Block EXISTS         | Ps_132504 | Family1736  | Ps_132505 | Family1718  |
|                 | Block EXISTS         | Ps_143883 | Family1718  | Ps_143884 | Family1736  |
| BlockID: Pso_33 | Gene missing         |           |             |           |             |
|                 | Block DOES NOT EXIST | Ps_115405 | No families | Ps_133479 | Family222   |
|                 | Block DOES NOT EXIST | Ps_119867 | No families | Ps_138989 | Family222   |
| BlockID: Pso_34 | Present              |           |             |           |             |
|                 | Block EXISTS         | Ps_110348 | Family18759 | Ps_127734 | Family7308  |
|                 | Block EXISTS         | Ps_125453 | Family18759 | Ps_144755 | Family7308  |
| BlockID: Pso_35 | Dissimilar families  |           |             |           |             |
|                 | Block DOES NOT EXIST | Ps_132109 | Family6     | Ps_132110 | Family18809 |
|                 | Block DOES NOT EXIST | Ps_132123 | Family11307 | Ps_132126 | Family2860  |
| BlockID: Pso_36 | Present              |           |             |           |             |
|                 | Block EXISTS         | Ps_133777 | Family6     | Ps_133778 | Family15    |
|                 | Block EXISTS         | Ps_134683 | Family6     | Ps_134684 | Family15    |



|                 |                     |                      |           |             |           |             |
|-----------------|---------------------|----------------------|-----------|-------------|-----------|-------------|
| BlockID: Pso_37 | Gene missing        |                      |           |             |           |             |
|                 |                     | Block DOES NOT EXIST | Ps_128070 | Family4596  | Ps_128071 | No families |
|                 |                     | Block DOES NOT EXIST | Ps_132589 | Family4596  | Ps_132590 | No families |
|                 |                     | Block DOES NOT EXIST | Ps_141877 | No families | Ps_141878 | Family4596  |
| BlockID: Pso_38 | Present             |                      |           |             |           |             |
|                 |                     | Block EXISTS         | Ps_138223 | Family2822  | Ps_138224 | Family6662  |
|                 |                     | Block EXISTS         | Ps_138231 | Family6662  | Ps_138232 | Family2822  |
| BlockID: Pso_39 | Dissimilar families |                      |           |             |           |             |
|                 |                     | Block DOES NOT EXIST | Ps_133796 | Family594   | Ps_133798 | Family386   |
|                 |                     | Block DOES NOT EXIST | Ps_138990 | Family386   | Ps_138991 | Family31727 |
| BlockID: Pso_4  | Dissimilar families |                      |           |             |           |             |
|                 |                     | Block DOES NOT EXIST | Ps_131130 | Family4     | Ps_131131 | Family5     |
|                 |                     | Block DOES NOT EXIST | Ps_137693 | No families | Ps_137694 | Family142   |
| BlockID: Pso_40 | Present             |                      |           |             |           |             |
|                 |                     | Block EXISTS         | Ps_119902 | Family7     | Ps_139055 | Family1405  |
|                 |                     | Block EXISTS         | Ps_122984 | Family7     | Ps_142601 | Family1405  |
| BlockID: Pso_41 | Present             |                      |           |             |           |             |
|                 |                     | Block EXISTS         | Ps_140249 | Family17027 | Ps_140250 | Family475   |
|                 |                     | Block EXISTS         | Ps_140260 | Family475   | Ps_140261 | Family17027 |
| BlockID: Pso_42 | Dissimilar families |                      |           |             |           |             |
|                 |                     | Block EXISTS         | Ps_133575 | Family12    | Ps_133576 | Family145   |
|                 |                     | Block DOES NOT EXIST | Ps_144266 | Family12    | Ps_144267 | Family6718  |
| BlockID: Pso_43 | Gene missing        |                      |           |             |           |             |
|                 |                     | Block DOES NOT EXIST | Ps_131842 | Family5769  | Ps_131843 | Family41    |
|                 |                     | Block DOES NOT EXIST | Ps_131848 | Family41    | Ps_131849 | No families |
| BlockID: Pso_44 | Dissimilar families |                      |           |             |           |             |
|                 |                     | Block DOES NOT EXIST | Ps_134698 | Family2955  | Ps_134699 | Family473   |
|                 |                     | Block DOES NOT EXIST | Ps_140157 | Family38    | Ps_140158 | Family5769  |
| BlockID: Pso_45 | Dissimilar families |                      |           |             |           |             |
|                 |                     | Block EXISTS         | Ps_131020 | Family389   | Ps_131021 | Family7     |
|                 |                     | Block DOES NOT EXIST | Ps_131041 | No families | Ps_131042 | Family389   |
| BlockID: Pso_46 | Present             |                      |           |             |           |             |
|                 |                     | Block EXISTS         | Ps_136207 | Family12009 | Ps_136208 | Family2737  |
|                 |                     | Block EXISTS         | Ps_136213 | Family2737  | Ps_136214 | Family12009 |
| BlockID: Pso_47 | Present             |                      |           |             |           |             |
|                 |                     | Block EXISTS         | Ps_108473 | Family23    | Ps_130365 | Family399   |
|                 |                     | Block EXISTS         | Ps_108475 | Family23    | Ps_130388 | Family399   |
| BlockID: Pso_48 | Present             |                      |           |             |           |             |
|                 |                     | Block EXISTS         | Ps_142235 | Family6137  | Ps_142236 | Family9014  |
|                 |                     | Block EXISTS         | Ps_142241 | Family9014  | Ps_142242 | Family6137  |
| BlockID: Pso_49 | Present             |                      |           |             |           |             |
|                 |                     | Block EXISTS         | Ps_141015 | Family12747 | Ps_141016 | Family416   |
|                 |                     | Block EXISTS         | Ps_143388 | Family416   | Ps_143389 | Family12747 |
| BlockID: Pso_5  | Dissimilar families |                      |           |             |           |             |
|                 |                     | Block DOES NOT EXIST | Ps_129902 | Family204   | Ps_129903 | Family8702  |
|                 |                     | Block DOES NOT EXIST | Ps_144898 | Family31943 | Ps_144899 | Family204   |
| BlockID: Pso_50 | Dissimilar families |                      |           |             |           |             |
|                 |                     | Block DOES NOT EXIST | Ps_116205 | Family138   | Ps_134325 | Family2445  |
|                 |                     | Block DOES NOT EXIST | Ps_134531 | Family138   | Ps_134532 | Family5976  |
| BlockID: Pso_51 | Present             |                      |           |             |           |             |
|                 |                     | Block EXISTS         | Ps_127846 | Family77    | Ps_127847 | Family53    |
|                 |                     | Block EXISTS         | Ps_140694 | Family53    | Ps_140695 | Family77    |
| BlockID: Pso_52 | Dissimilar families |                      |           |             |           |             |
|                 |                     | Block DOES NOT EXIST | Ps_134617 | Family606   | Ps_134618 | Family281   |
|                 |                     | Block DOES NOT EXIST | Ps_139431 | Family53    | Ps_139432 | Family281   |
| BlockID: Pso_53 | Present             |                      |           |             |           |             |
|                 |                     | Block EXISTS         | Ps_127842 | Family53    | Ps_127843 | Family1465  |
|                 |                     | Block EXISTS         | Ps_127847 | Family53    | Ps_127848 | Family1465  |
| BlockID: Pso_54 | Present             |                      |           |             |           |             |
|                 |                     | Block DOES NOT EXIST | Ps_129409 | Family31415 | Ps_129410 | No families |

|                 |                        |           |             |           |             |
|-----------------|------------------------|-----------|-------------|-----------|-------------|
|                 | Block EXISTS           | Ps_131043 | Family10414 | Ps_131044 | Family6189  |
|                 | Block EXISTS           | Ps_133881 | Family10414 | Ps_133882 | Family6189  |
|                 | Block DOES NOT EXIST   | Ps_135372 | Family6189  | Ps_135373 | Family2946  |
|                 | Block EXISTS           | Ps_136153 | Family10414 | Ps_136154 | Family6189  |
|                 | Block DOES NOT EXIST   | Ps_140054 | Family6189  | Ps_140055 | No families |
|                 | Block DOES NOT EXIST   | Ps_141701 | Family6189  | Ps_141702 | No families |
|                 | Block DOES NOT EXIST   | Ps_141786 | Family6189  | Ps_141787 | No families |
| BlockID: Pso_55 | Present                |           |             |           |             |
|                 | Block EXISTS           | Ps_132013 | Family25    | Ps_132014 | Family6911  |
|                 | Block EXISTS           | Ps_132044 | Family25    | Ps_132045 | Family6911  |
| BlockID: Pso_56 | Dissimilar families    |           |             |           |             |
|                 | Block DOES NOT EXIST   | Ps_109225 | Family29    | Ps_139603 | Family2241  |
|                 | Block DOES NOT EXIST   | Ps_139645 | Family5234  | Ps_139646 | Family29    |
| BlockID: Pso_57 | Present                |           |             |           |             |
|                 | Block EXISTS           | Ps_140778 | Family610   | Ps_140779 | Family79    |
|                 | Block EXISTS           | Ps_140782 | Family79    | Ps_140783 | Family610   |
| BlockID: Pso_58 | Dissimilar families    |           |             |           |             |
|                 | Block DOES NOT EXIST   | Ps_140309 | Family7678  | Ps_140310 | Family1123  |
|                 | Block DOES NOT EXIST   | Ps_140313 | Family220   | Ps_140314 | Family1123  |
| BlockID: Pso_59 | Dissimilar families    |           |             |           |             |
|                 | Block DOES NOT EXIST   | Ps_132661 | Family2848  | Ps_132662 | Family18012 |
|                 | Block DOES NOT EXIST   | Ps_142929 | No families | Ps_142930 | Family31859 |
| BlockID: Pso_6  | Present                |           |             |           |             |
|                 | Block EXISTS           | Ps_129660 | Family9     | Ps_129661 | Family6911  |
|                 | Block EXISTS           | Ps_129662 | Family6911  | Ps_129663 | Family9     |
| BlockID: Pso_60 | Dissimilar families    |           |             |           |             |
|                 | Block DOES NOT EXIST   | Ps_129705 | Family11444 | Ps_129706 | Family10955 |
|                 | Block DOES NOT EXIST   | Ps_129707 | Family11444 | Ps_129708 | Family87    |
| BlockID: Pso_61 | Dissimilar families    |           |             |           |             |
|                 | Block DOES NOT EXIST   | Ps_137760 | Family11763 | Ps_137761 | Family5512  |
|                 | Block DOES NOT EXIST   | Ps_143474 | Family3805  | Ps_143475 | Family5512  |
| BlockID: Pso_62 | Present (diff. copies) |           |             |           |             |
|                 | Block DOES NOT EXIST   | Ps_109200 | No families | Ps_109201 | Family11468 |
|                 | Block EXISTS           | Ps_109204 | Family11468 | Ps_139328 | Family7     |
| BlockID: Pso_63 | Present                |           |             |           |             |
|                 | Block EXISTS           | Ps_108654 | Family7     | Ps_132903 | Family244   |
|                 | Block EXISTS           | Ps_131034 | Family7     | Ps_131035 | Family244   |
| BlockID: Pso_64 | Present                |           |             |           |             |
|                 | Block EXISTS           | Ps_138679 | Family3058  | Ps_138680 | Family2118  |
|                 | Block EXISTS           | Ps_143814 | Family2118  | Ps_143815 | Family3058  |
| BlockID: Pso_65 | Gene missing           |           |             |           |             |
|                 | Block DOES NOT EXIST   | Ps_139701 | No families | Ps_139702 | No families |
|                 | Block DOES NOT EXIST   | Ps_140221 | No families | Ps_140222 | Family4844  |
| BlockID: Pso_66 | Gene missing           |           |             |           |             |
|                 | Block DOES NOT EXIST   | Ps_138487 | No families | Ps_138488 | Family10998 |
|                 | Block DOES NOT EXIST   | Ps_139608 | No families | Ps_139609 | No families |
| BlockID: Pso_67 | Present                |           |             |           |             |
|                 | Block EXISTS           | Ps_128174 | Family727   | Ps_128175 | Family1251  |
|                 | Block EXISTS           | Ps_128178 | Family1251  | Ps_128179 | Family727   |
| BlockID: Pso_68 | Dissimilar families    |           |             |           |             |
|                 | Block DOES NOT EXIST   | Ps_142234 | Family0     | Ps_142235 | Family6137  |
|                 | Block DOES NOT EXIST   | Ps_142242 | Family6137  | Ps_142243 | Family4905  |
| BlockID: Pso_69 | Present                |           |             |           |             |
|                 | Block EXISTS           | Ps_136652 | Family931   | Ps_136653 | Family69    |
|                 | Block EXISTS           | Ps_142343 | Family931   | Ps_142344 | Family69    |
|                 | Block EXISTS           | Ps_143888 | Family931   | Ps_143889 | Family69    |
| BlockID: Pso_7  | Present                |           |             |           |             |
|                 | Block EXISTS           | Ps_131372 | Family174   | Ps_131373 | Family127   |
|                 | Block EXISTS           | Ps_131376 | Family127   | Ps_131377 | Family174   |
| BlockID: Pso_70 | Present                |           |             |           |             |

|                 |                        |           |             |           |             |
|-----------------|------------------------|-----------|-------------|-----------|-------------|
|                 | Block EXISTS           | Ps_143825 | Family34    | Ps_143826 | Family2027  |
|                 | Block EXISTS           | Ps_144596 | Family2027  | Ps_144597 | Family34    |
| BlockID: Pso_71 | Present                |           |             |           |             |
|                 | Block EXISTS           | Ps_109131 | Family120   | Ps_109132 | Family42    |
|                 | Block EXISTS           | Ps_109133 | Family120   | Ps_138365 | Family42    |
| BlockID: Pso_72 | Present                |           |             |           |             |
|                 | Block EXISTS           | Ps_130945 | Family18803 | Ps_130946 | Family2454  |
|                 | Block EXISTS           | Ps_130949 | Family2454  | Ps_130950 | Family18803 |
| BlockID: Pso_73 | Present                |           |             |           |             |
|                 | Block EXISTS           | Ps_139045 | Family4     | Ps_139046 | Family4734  |
|                 | Block EXISTS           | Ps_143224 | Family4734  | Ps_143225 | Family4     |
| BlockID: Pso_74 | Present                |           |             |           |             |
|                 | Block EXISTS           | Ps_131657 | Family85    | Ps_131658 | Family1168  |
|                 | Block EXISTS           | Ps_144374 | Family85    | Ps_144375 | Family1168  |
|                 | Block EXISTS           | Ps_144377 | Family85    | Ps_144378 | Family1168  |
| BlockID: Pso_75 | Dissimilar families    |           |             |           |             |
|                 | Block DOES NOT EXIST   | Ps_128346 | Family1561  | Ps_128347 | Family901   |
|                 | Block DOES NOT EXIST   | Ps_143534 | Family901   | Ps_143535 | Family233   |
| BlockID: Pso_76 | Dissimilar families    |           |             |           |             |
|                 | Block DOES NOT EXIST   | Ps_139683 | Family14140 | Ps_139684 | Family429   |
|                 | Block DOES NOT EXIST   | Ps_139686 | No families | Ps_139687 | Family77    |
| BlockID: Pso_77 | Present                |           |             |           |             |
|                 | Block EXISTS           | Ps_133243 | Family585   | Ps_133244 | Family14287 |
|                 | Block EXISTS           | Ps_143040 | Family14287 | Ps_143041 | Family585   |
| BlockID: Pso_78 | Dissimilar families    |           |             |           |             |
|                 | Block DOES NOT EXIST   | Ps_124358 | Family31246 | Ps_143885 | Family4715  |
|                 | Block DOES NOT EXIST   | Ps_140634 | Family4715  | Ps_158174 | Family6467  |
| BlockID: Pso_79 | Present (diff. copies) |           |             |           |             |
|                 | Block EXISTS           | Ps_134952 | Family13244 | Ps_134953 | Family10373 |
|                 | Block DOES NOT EXIST   | Ps_135009 | Family11618 | Ps_135010 | Family10373 |
| BlockID: Pso_8  | Present                |           |             |           |             |
|                 | Block EXISTS           | Ps_139401 | Family228   | Ps_139402 | Family14    |
|                 | Block EXISTS           | Ps_139403 | Family14    | Ps_139404 | Family228   |
| BlockID: Pso_80 | Present                |           |             |           |             |
|                 | Block EXISTS           | Ps_108619 | Family947   | Ps_108620 | Family6498  |
|                 | Block EXISTS           | Ps_108621 | Family947   | Ps_132315 | Family6498  |
| BlockID: Pso_81 | Dissimilar families    |           |             |           |             |
|                 | Block EXISTS           | Ps_135819 | Family243   | Ps_135820 | Family70    |
|                 | Block DOES NOT EXIST   | Ps_135822 | Family418   | Ps_157306 | No families |
| BlockID: Pso_82 | Present                |           |             |           |             |
|                 | Block EXISTS           | Ps_113278 | Family24    | Ps_131000 | Family572   |
|                 | Block EXISTS           | Ps_140536 | Family572   | Ps_140537 | Family24    |
| BlockID: Pso_83 | Present                |           |             |           |             |
|                 | Block EXISTS           | Ps_141282 | Family239   | Ps_141283 | Family379   |
|                 | Block EXISTS           | Ps_141285 | Family379   | Ps_141286 | Family239   |
| BlockID: Pso_84 | Dissimilar families    |           |             |           |             |
|                 | Block DOES NOT EXIST   | Ps_130496 | Family134   | Ps_130497 | Family12506 |
|                 | Block DOES NOT EXIST   | Ps_130498 | Family18801 | Ps_130499 | Family134   |
| BlockID: Pso_85 | Dissimilar families    |           |             |           |             |
|                 | Block DOES NOT EXIST   | Ps_132889 | Family12378 | Ps_132890 | Family554   |
|                 | Block DOES NOT EXIST   | Ps_142351 | Family11941 | Ps_142353 | Family12244 |
| BlockID: Pso_86 | Present                |           |             |           |             |
|                 | Block EXISTS           | Ps_134706 | Family4602  | Ps_134707 | Family7534  |
|                 | Block EXISTS           | Ps_134710 | Family7534  | Ps_134711 | Family4602  |
| BlockID: Pso_87 | Present                |           |             |           |             |
|                 | Block EXISTS           | Ps_144416 | Family187   | Ps_144417 | Family340   |
|                 | Block DOES NOT EXIST   | Ps_144418 | Family1520  | Ps_144419 | Family340   |
|                 | Block EXISTS           | Ps_144420 | Family340   | Ps_144421 | Family187   |
| BlockID: Pso_88 | Dissimilar families    |           |             |           |             |
|                 | Block DOES NOT EXIST   | Ps_133123 | Family18489 | Ps_156643 | Family5293  |

|                 |                      |           |             |           |             |
|-----------------|----------------------|-----------|-------------|-----------|-------------|
|                 | Block DOES NOT EXIST | Ps_143463 | Family5293  | Ps_143464 | Family18862 |
| BlockID: Pso_89 | Present              |           |             |           |             |
|                 | Block EXISTS         | Ps_139046 | Family4734  | Ps_139047 | Family474   |
|                 | Block EXISTS         | Ps_143223 | Family474   | Ps_143224 | Family4734  |
| BlockID: Pso_9  | Gene missing         |           |             |           |             |
|                 | Block DOES NOT EXIST | Ps_136254 | Family432   | Ps_136256 | No families |
|                 | Block DOES NOT EXIST | Ps_143315 | Family432   | Ps_143316 | No families |
| BlockID: Pso_90 | Present              |           |             |           |             |
|                 | Block EXISTS         | Ps_109030 | Family47    | Ps_137432 | Family105   |
|                 | Block EXISTS         | Ps_137420 | Family105   | Ps_137421 | Family47    |
| BlockID: Pso_91 | Present              |           |             |           |             |
|                 | Block EXISTS         | Ps_138685 | Family105   | Ps_138686 | Family86    |
|                 | Block EXISTS         | Ps_143548 | Family86    | Ps_143549 | Family105   |
| BlockID: Pso_92 | Present              |           |             |           |             |
|                 | Block EXISTS         | Ps_132021 | Family4666  | Ps_132022 | Family25    |
|                 | Block EXISTS         | Ps_132026 | Family25    | Ps_132027 | Family4666  |
| BlockID: Pso_93 | Present              |           |             |           |             |
|                 | Block EXISTS         | Ps_109456 | Family31    | Ps_142236 | Family9014  |
|                 | Block EXISTS         | Ps_109457 | Family31    | Ps_142241 | Family9014  |
| BlockID: Pso_94 | Present              |           |             |           |             |
|                 | Block DOES NOT EXIST | Ps_143790 | Family227   | Ps_143791 | Family3623  |
|                 | Block EXISTS         | Ps_143792 | Family14689 | Ps_143793 | Family227   |
|                 | Block EXISTS         | Ps_144411 | Family14689 | Ps_144412 | Family227   |
| BlockID: Pso_95 | One family           |           |             |           |             |
|                 | Block DOES NOT EXIST | Ps_138329 | Family271   | Ps_138330 | Family271   |
|                 | Block DOES NOT EXIST | Ps_138335 | Family271   | Ps_138336 | Family271   |
| BlockID: Pso_96 | Dissimilar families  |           |             |           |             |
|                 | Block DOES NOT EXIST | Ps_131226 | Family1862  | Ps_131227 | Family11227 |
|                 | Block DOES NOT EXIST | Ps_144395 | Family1862  | Ps_144396 | Family7389  |
| BlockID: Pso_97 | Gene missing         |           |             |           |             |
|                 | Block DOES NOT EXIST | Ps_134707 | Family7534  | Ps_134708 | No families |
|                 | Block DOES NOT EXIST | Ps_134709 | Family26    | Ps_134710 | Family7534  |
| BlockID: Pso_98 | Present              |           |             |           |             |
|                 | Block EXISTS         | Ps_136398 | Family12512 | Ps_136399 | Family1480  |
|                 | Block EXISTS         | Ps_139588 | Family1480  | Ps_139589 | Family12512 |
| BlockID: Pso_99 | Present              |           |             |           |             |
|                 | Block EXISTS         | Ps_137552 | Family671   | Ps_137553 | Family148   |
|                 | Block EXISTS         | Ps_137594 | Family148   | Ps_137595 | Family671   |

## References

Jurka J, Kapitonov VV, Pavlicek A, Klonowski P, Kohany O et al. 2005. Repbase update, a database of eukaryotic repetitive elements. *Cytogenetic and Genome Research* 110:462-467.

Martens C, Van de Peer Y. 2010. The hidden duplication past of the plant pathogen *Phytophthora* and its consequences for infection. *BMC Genomics* 11:353.
